# Supplementary material
Source: publisher site journal article supplement (https://www.dovepress.com/get_supplementary_file.php?f=284889.docx)
Supplement: Supplementary file 1 [file get_supplementary_file.php]

**Supplementary Figure 1** The flow diagram of this work.

**
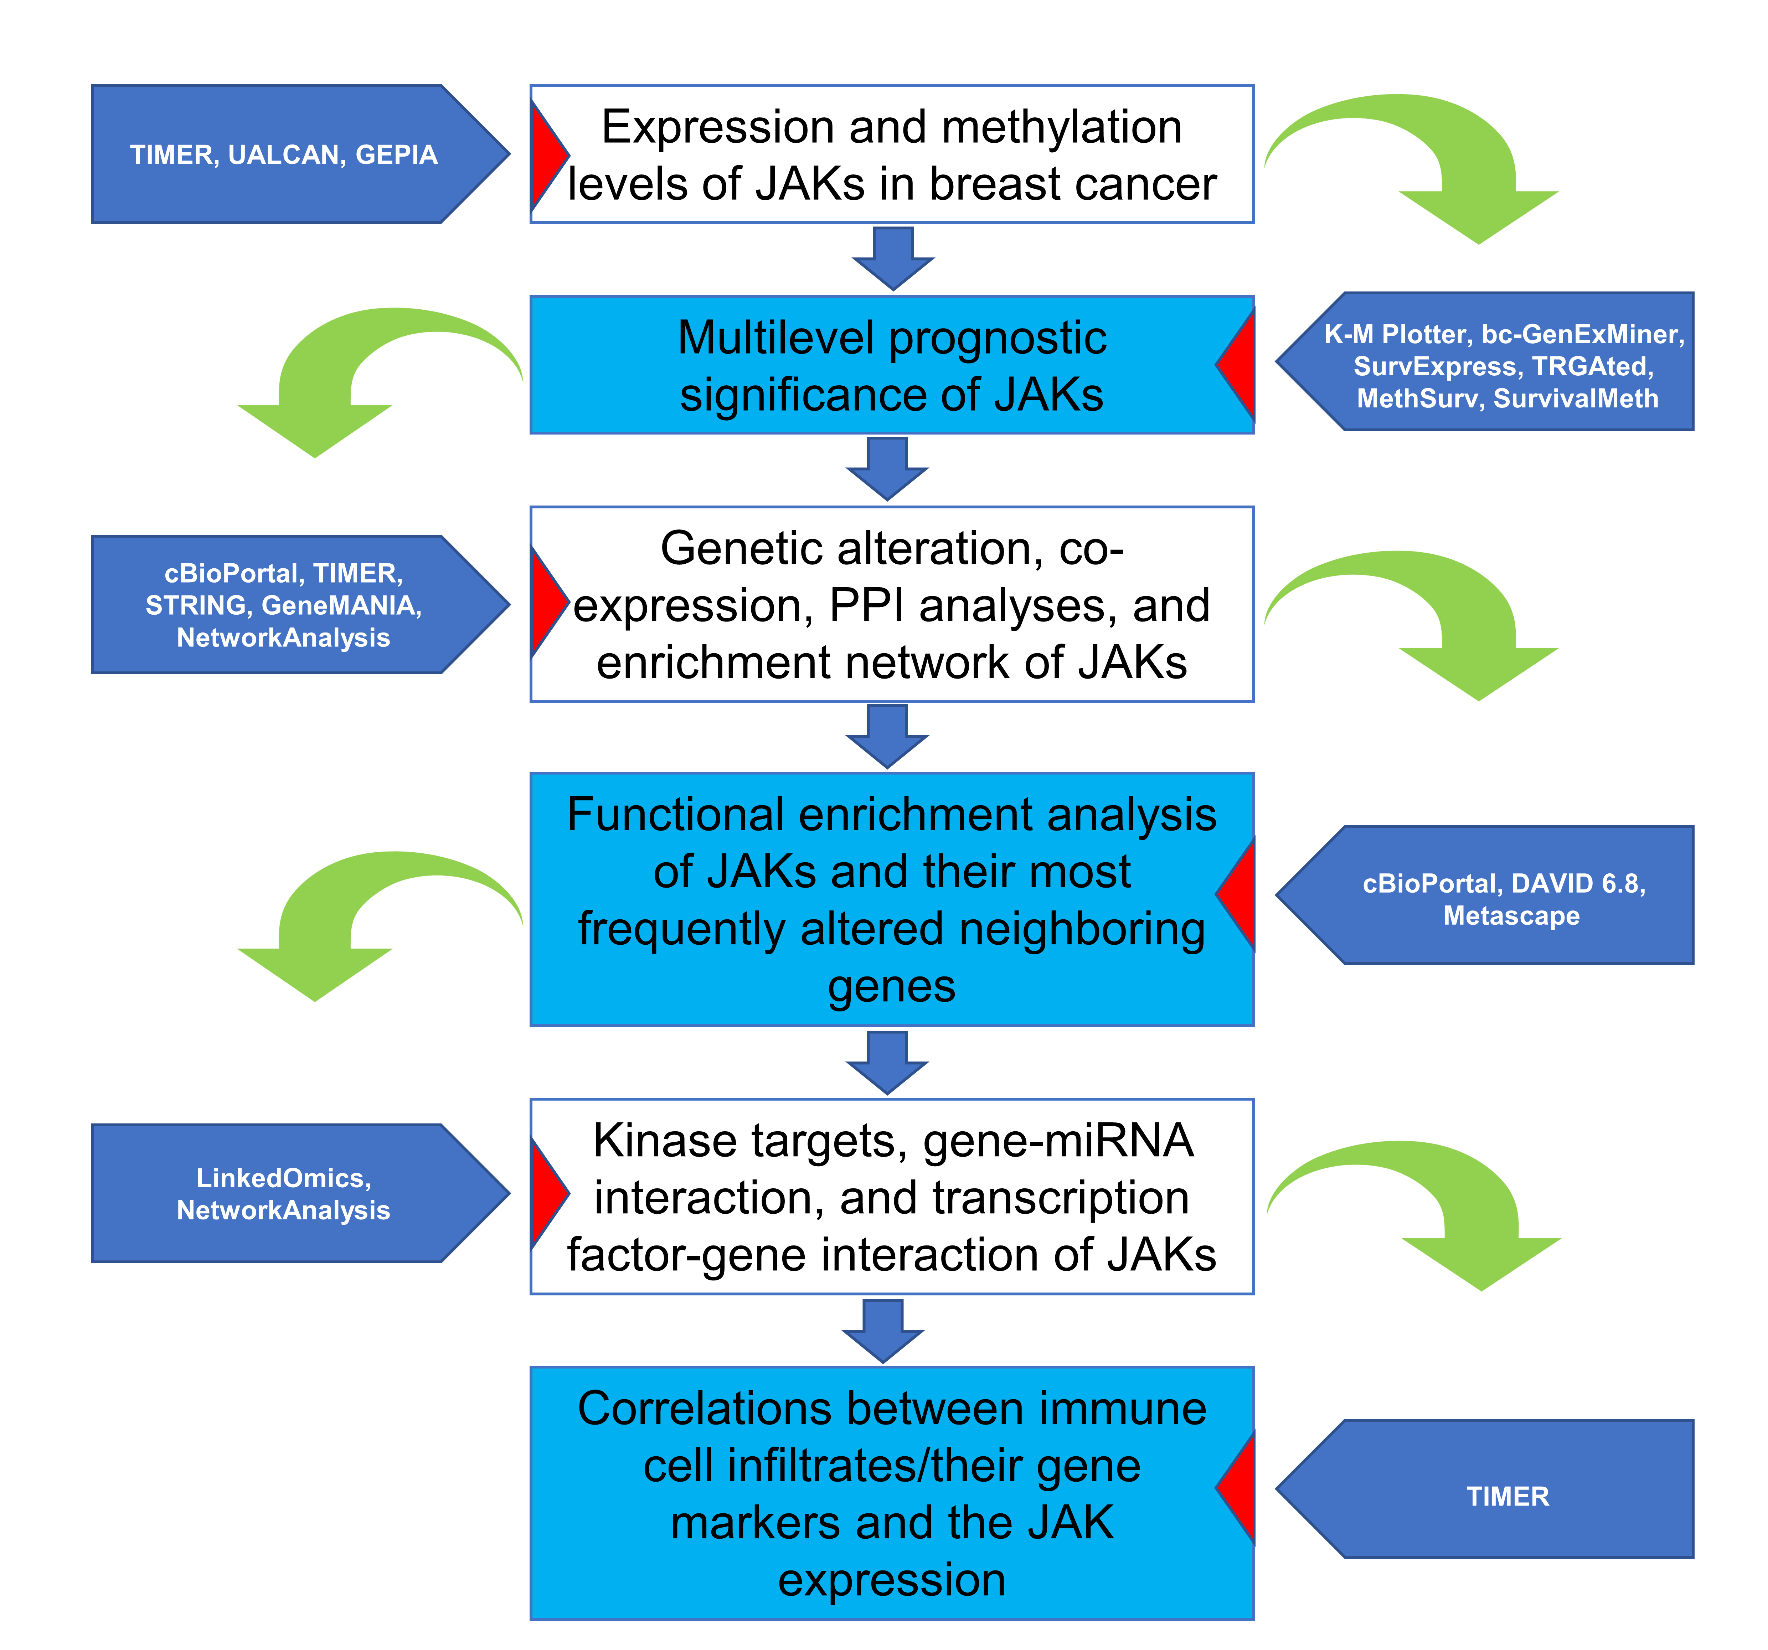
**

**Supplementary Figure 2** The relative level of JAKs mRNA in BC samples.


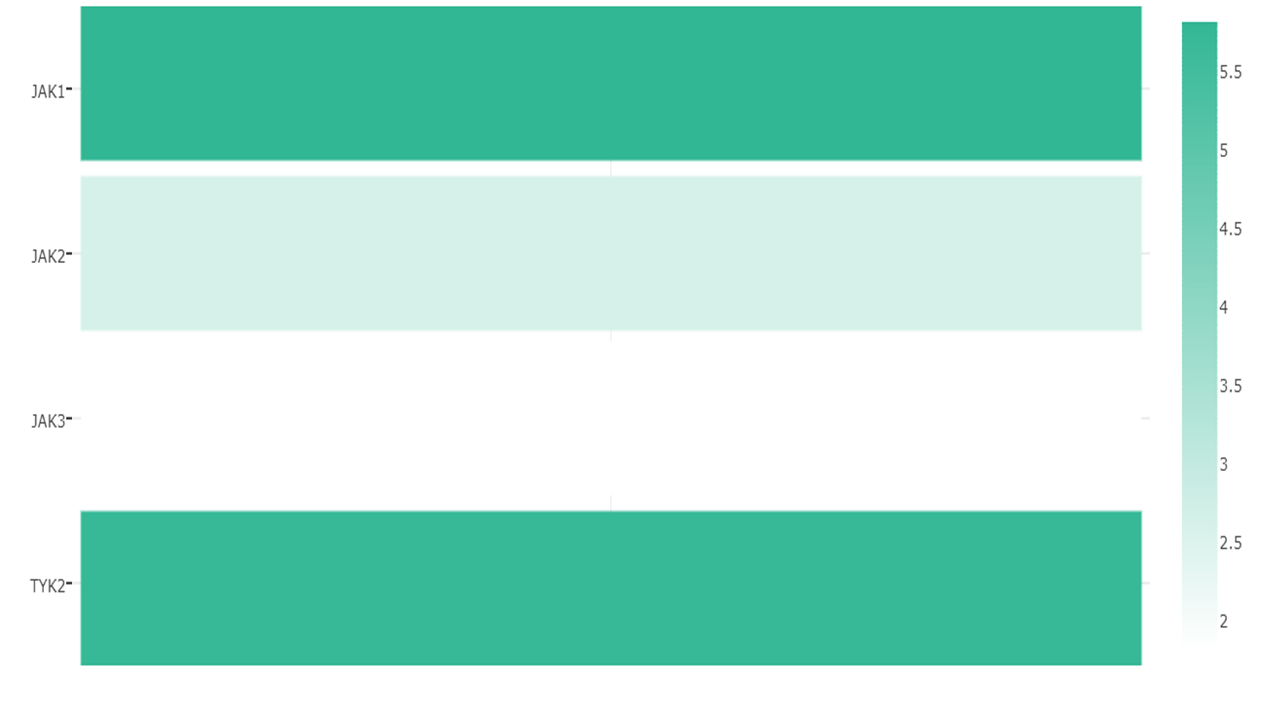


**Supplementary Figure 3** Correlation between the expression of JAK1(**A**), JAK2 (**B**), JAK3 (**C**), TYK2 (**D**) and the pathological stage of BC patients.


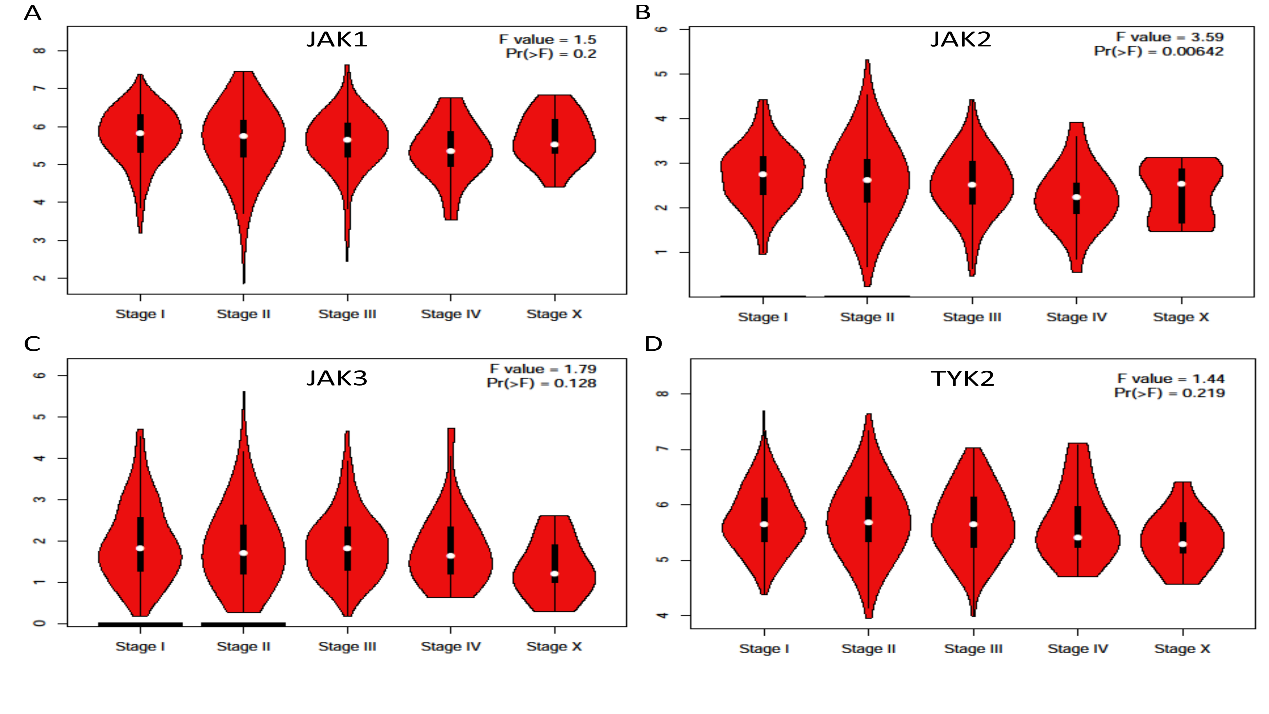


**Supplementary Figure 4** Survival curves of OS (**A-D**) and DFS (**E-H**) for the expression of JAKs in breast cancer cases using bc-GenExMiner platform.


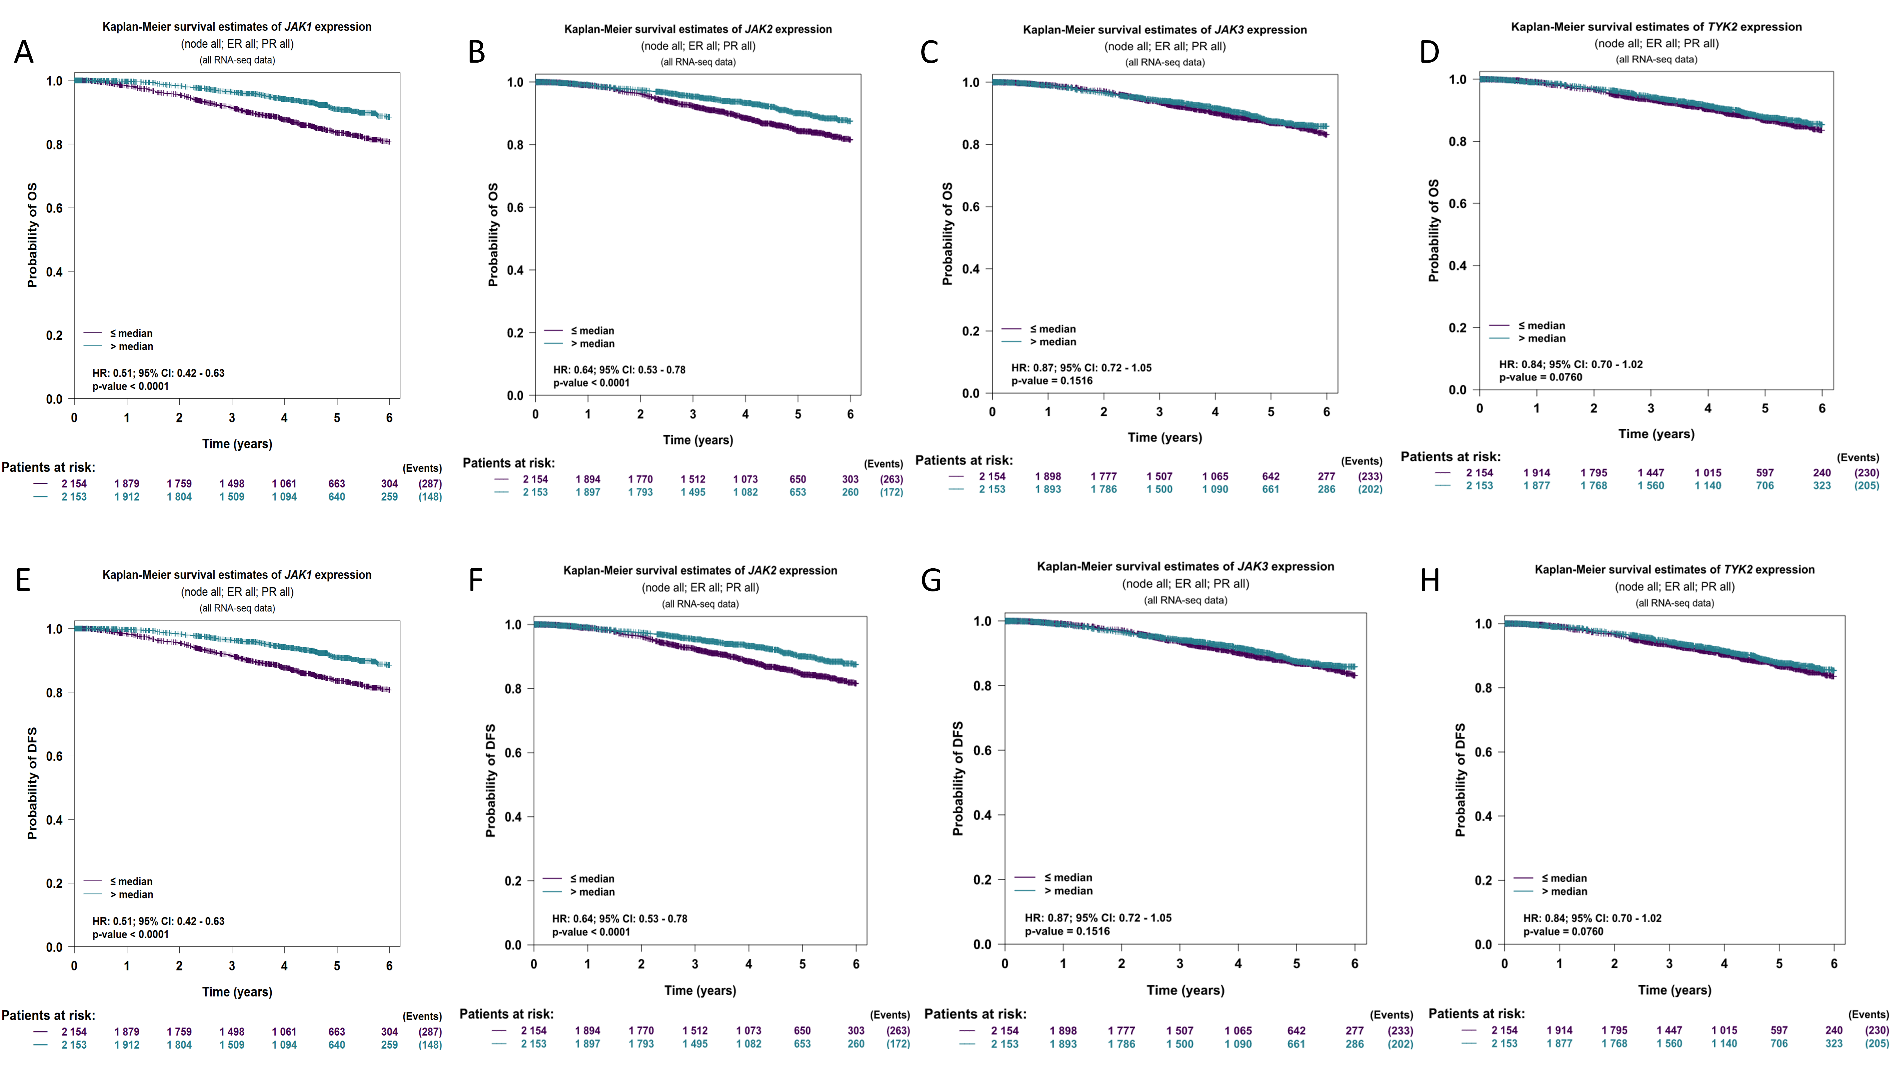


**Supplementary Figure 5** The prognostic value of OS of JAKs signature in BC in the TCGA cohort via SurvExpress. (**A**) the mRNA expression of JAKs between high and low risk group; (**B**) the heat map of mRNA expression of JAKs; (**C**) Survival curve of OS between high and low risk group.


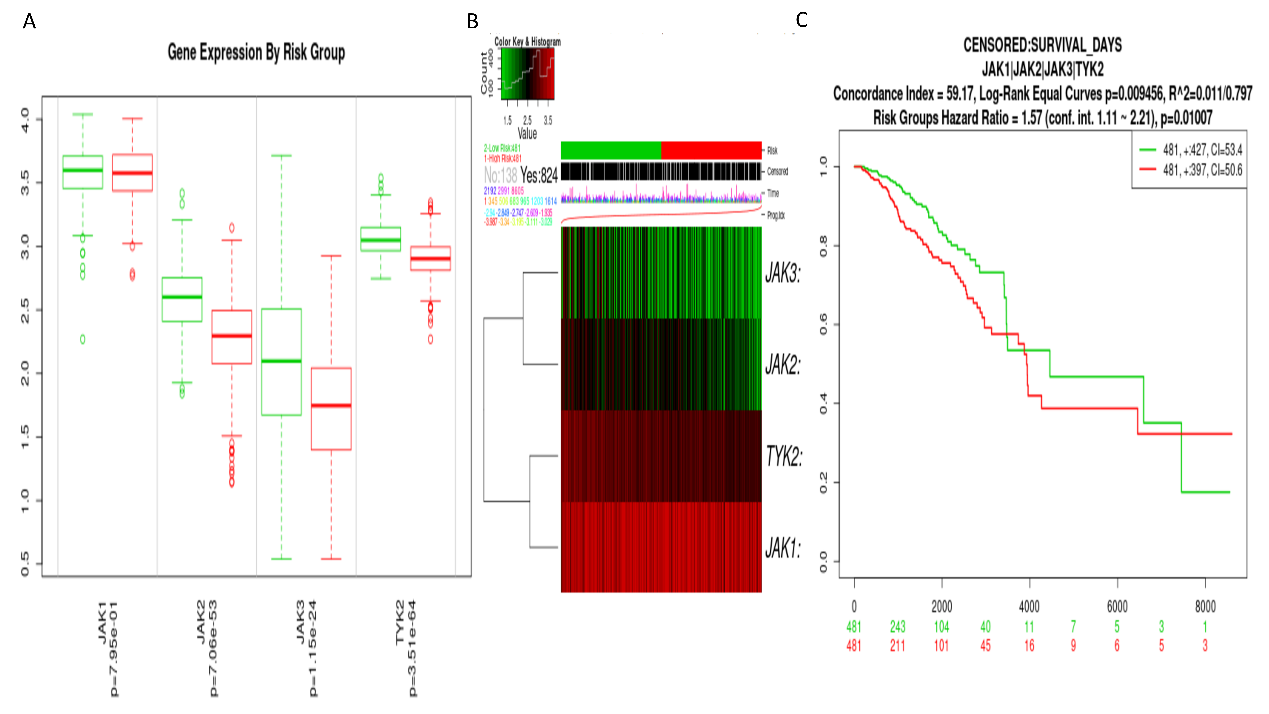


**Supplementary Figure 6** The heat maps of DNA methylation clustered expression level of JAKs genes.


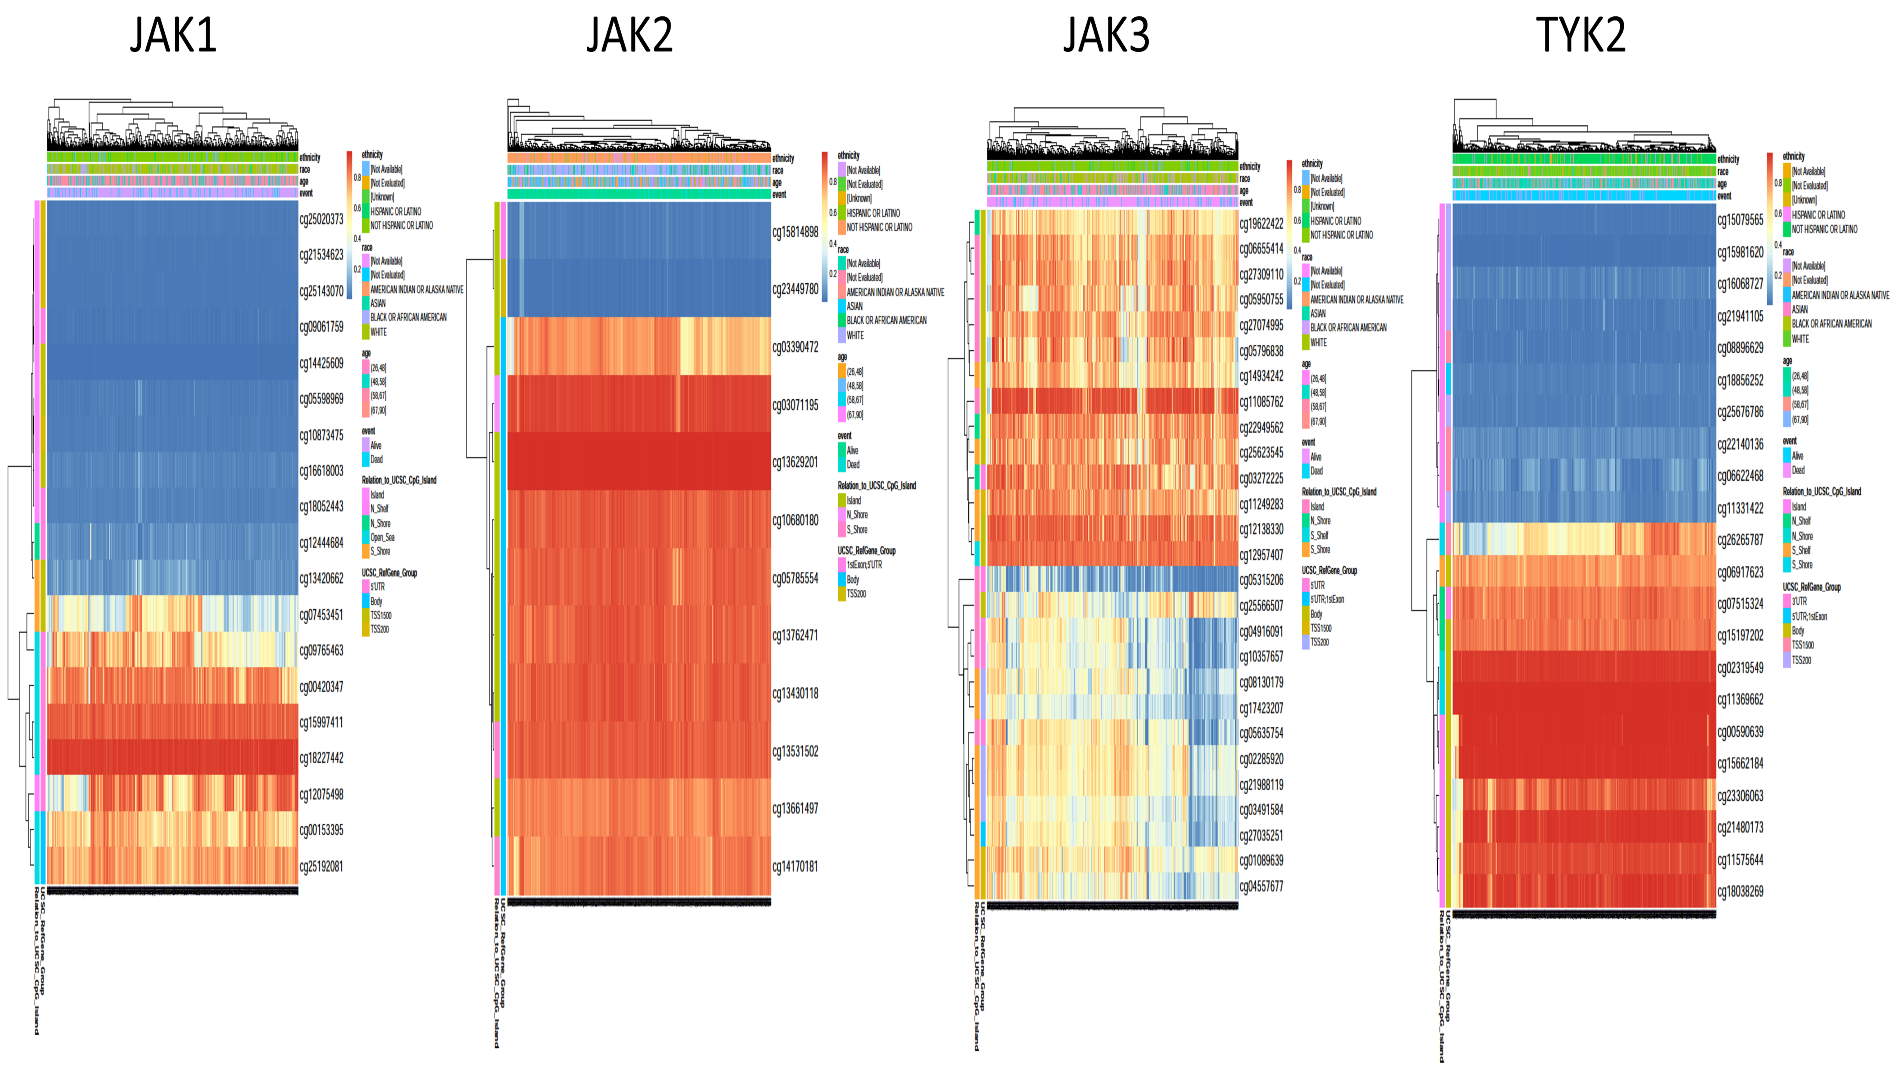


**Supplementary Figure 7** Visual analytics of enrichment network of JAKs in the biological process terms (**A**), cellular component terms (**B**), molecular function terms (**C**), and KEGG enriched terms (**D**) using NetworkAnalysis.


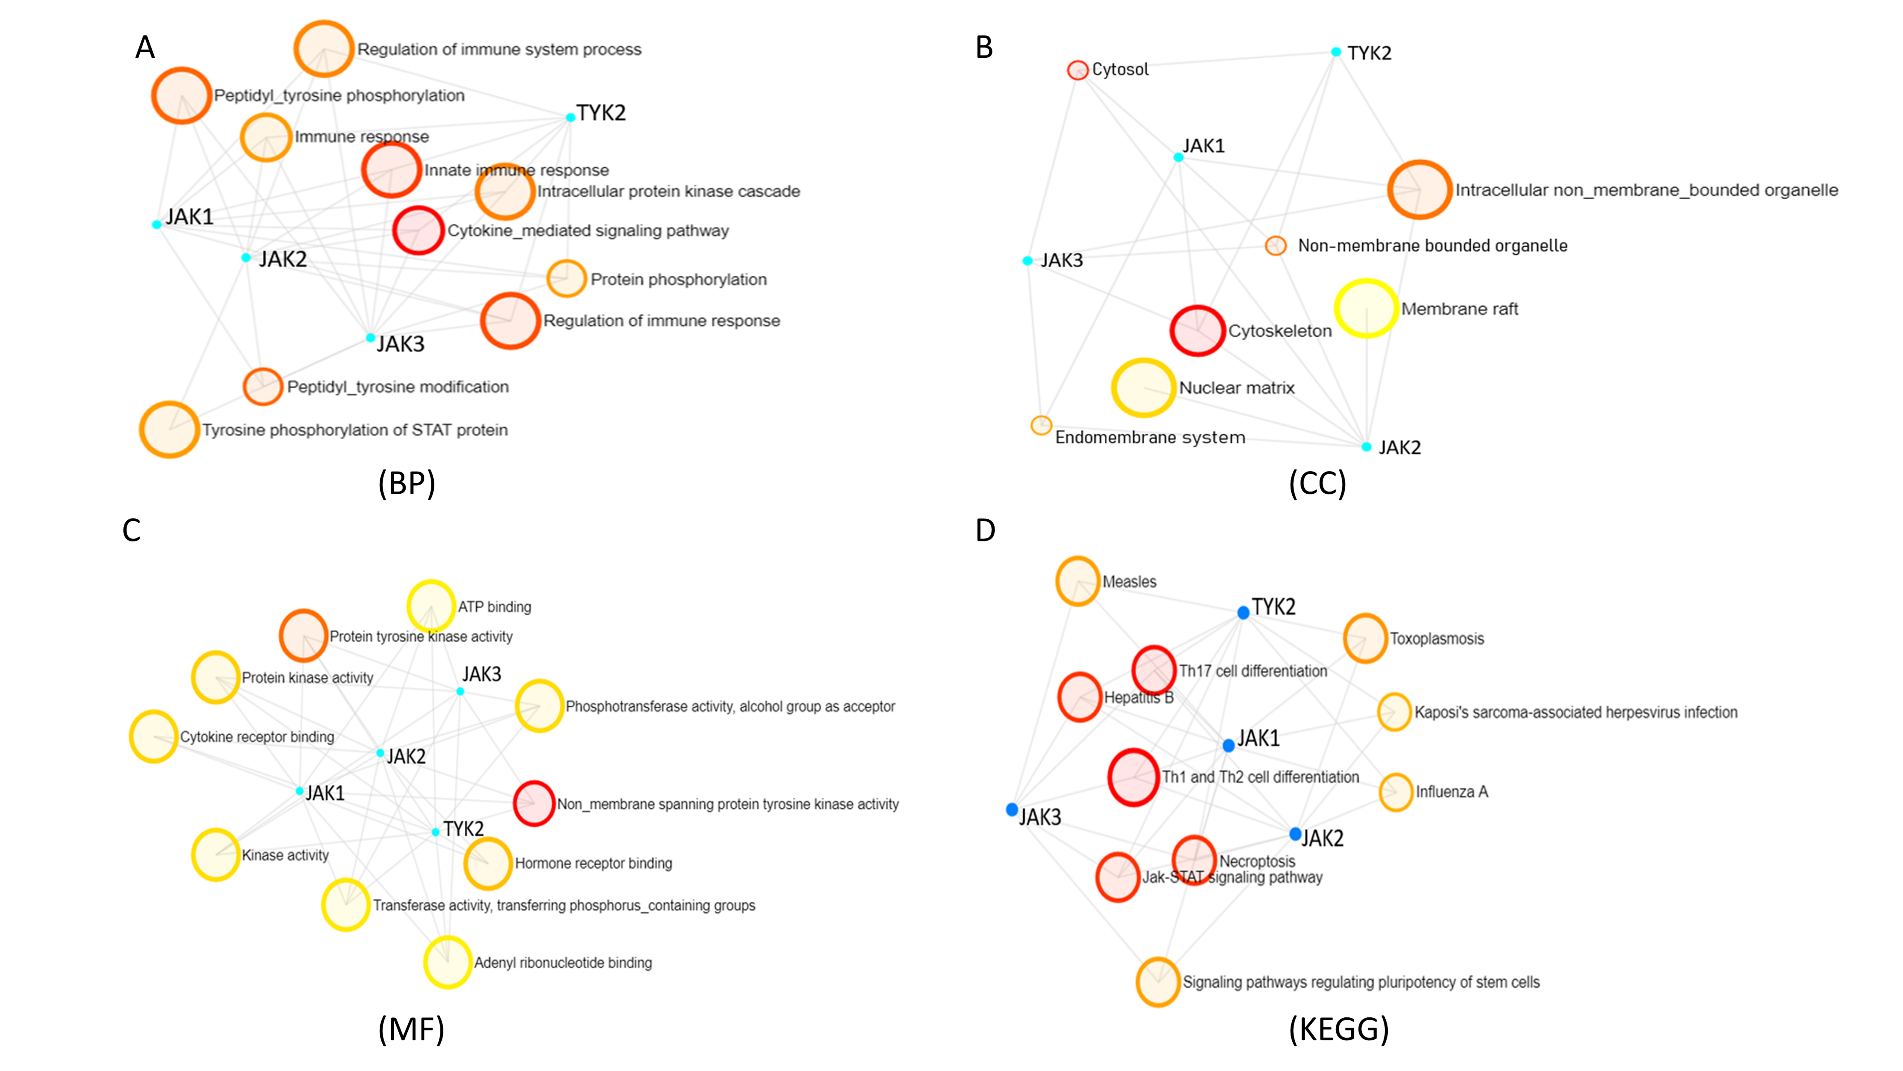


**Supplementary Figure 8** Bar plots of enrichment terms of JAKs in biological process (BP), cellular component (CC), and molecular function (MF) (**A**) and KEGG pathway analysis (**B**).


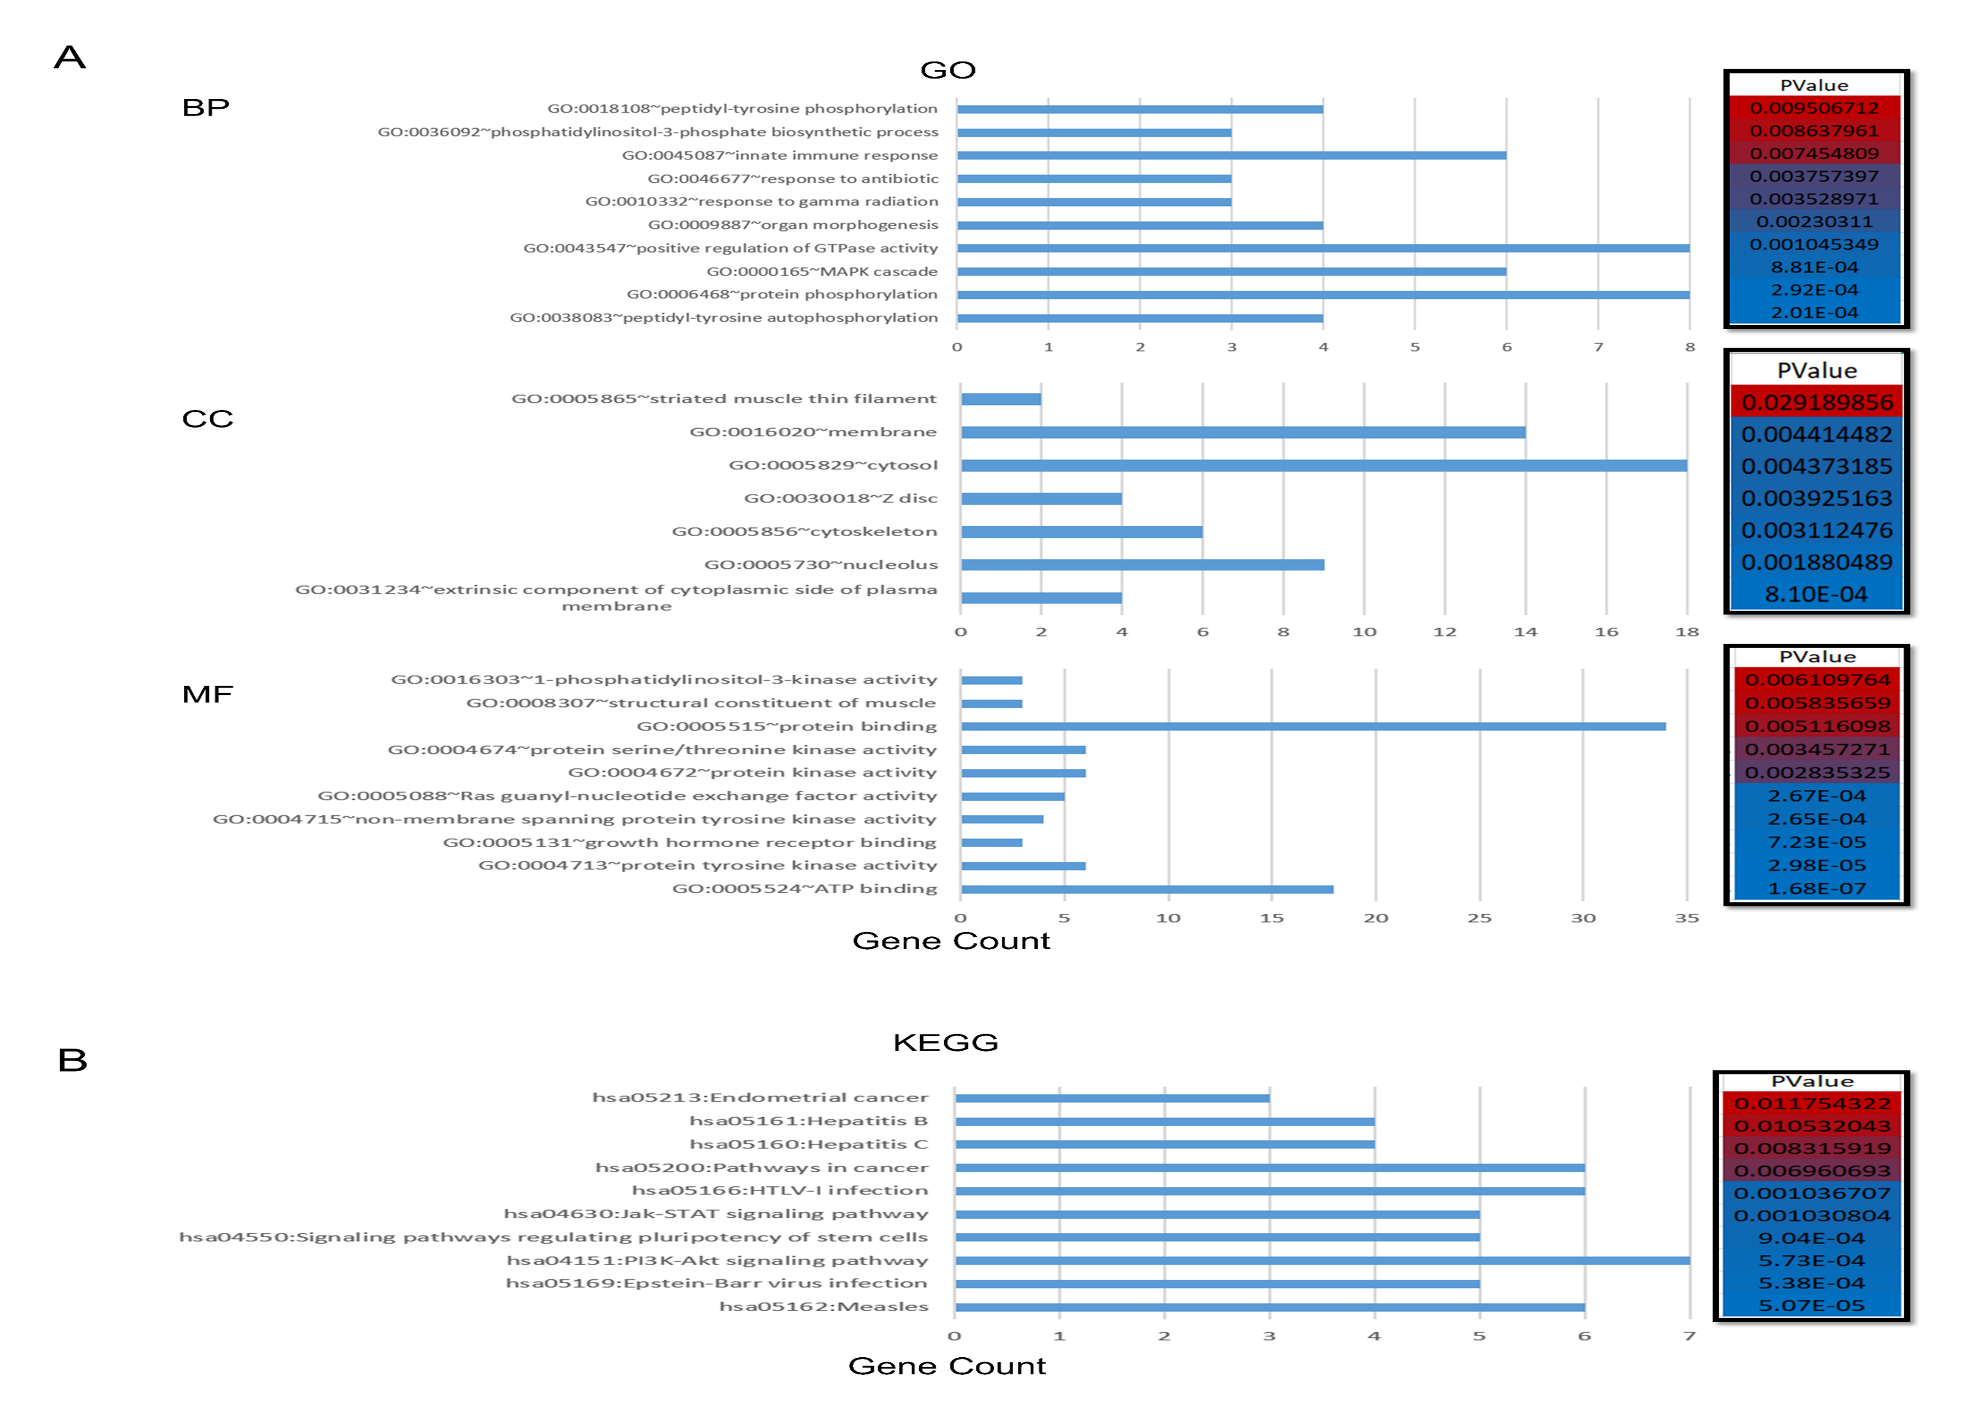


**Supplementary Figure 9** Bar graph of enriched terms across input gene lists, colored by P-values.


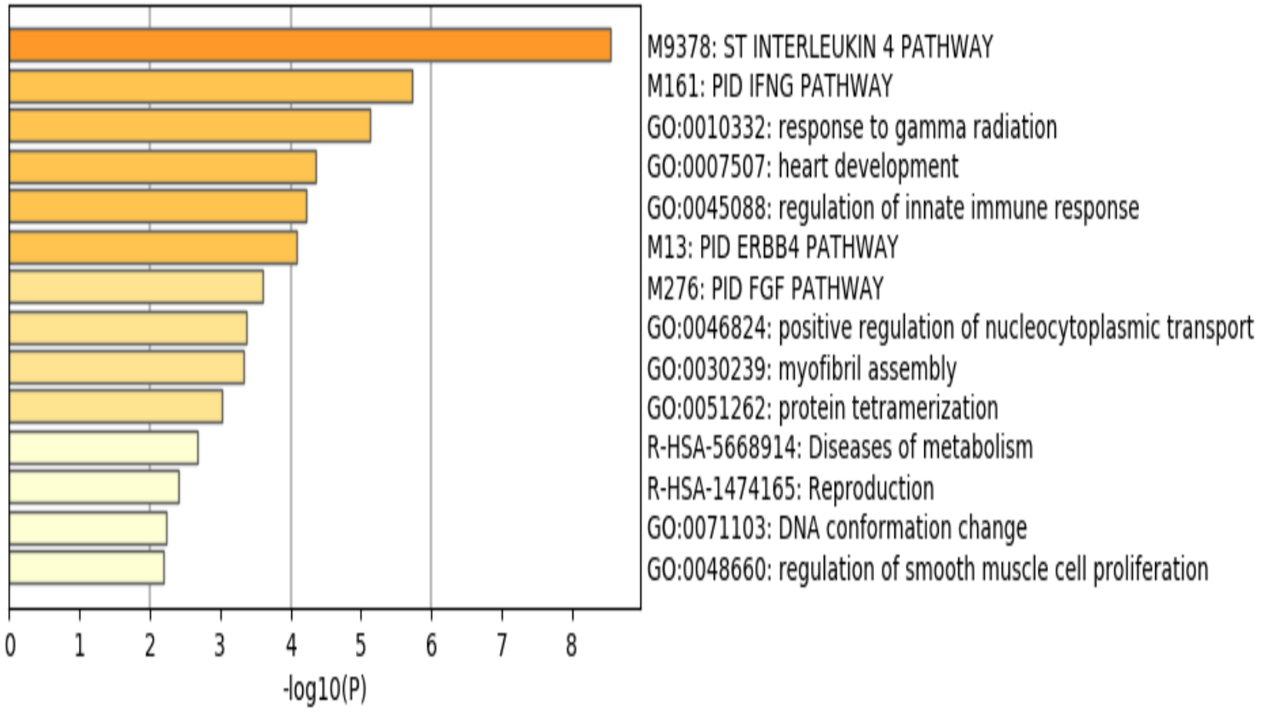


**Supplementary Figure 10** Network of enriched terms: (**A**) colored by cluster ID, where nodes that share the same cluster ID are typically close to each other; (**B**) colored by P-value, where terms containing more genes tend to have a more significant P-value.


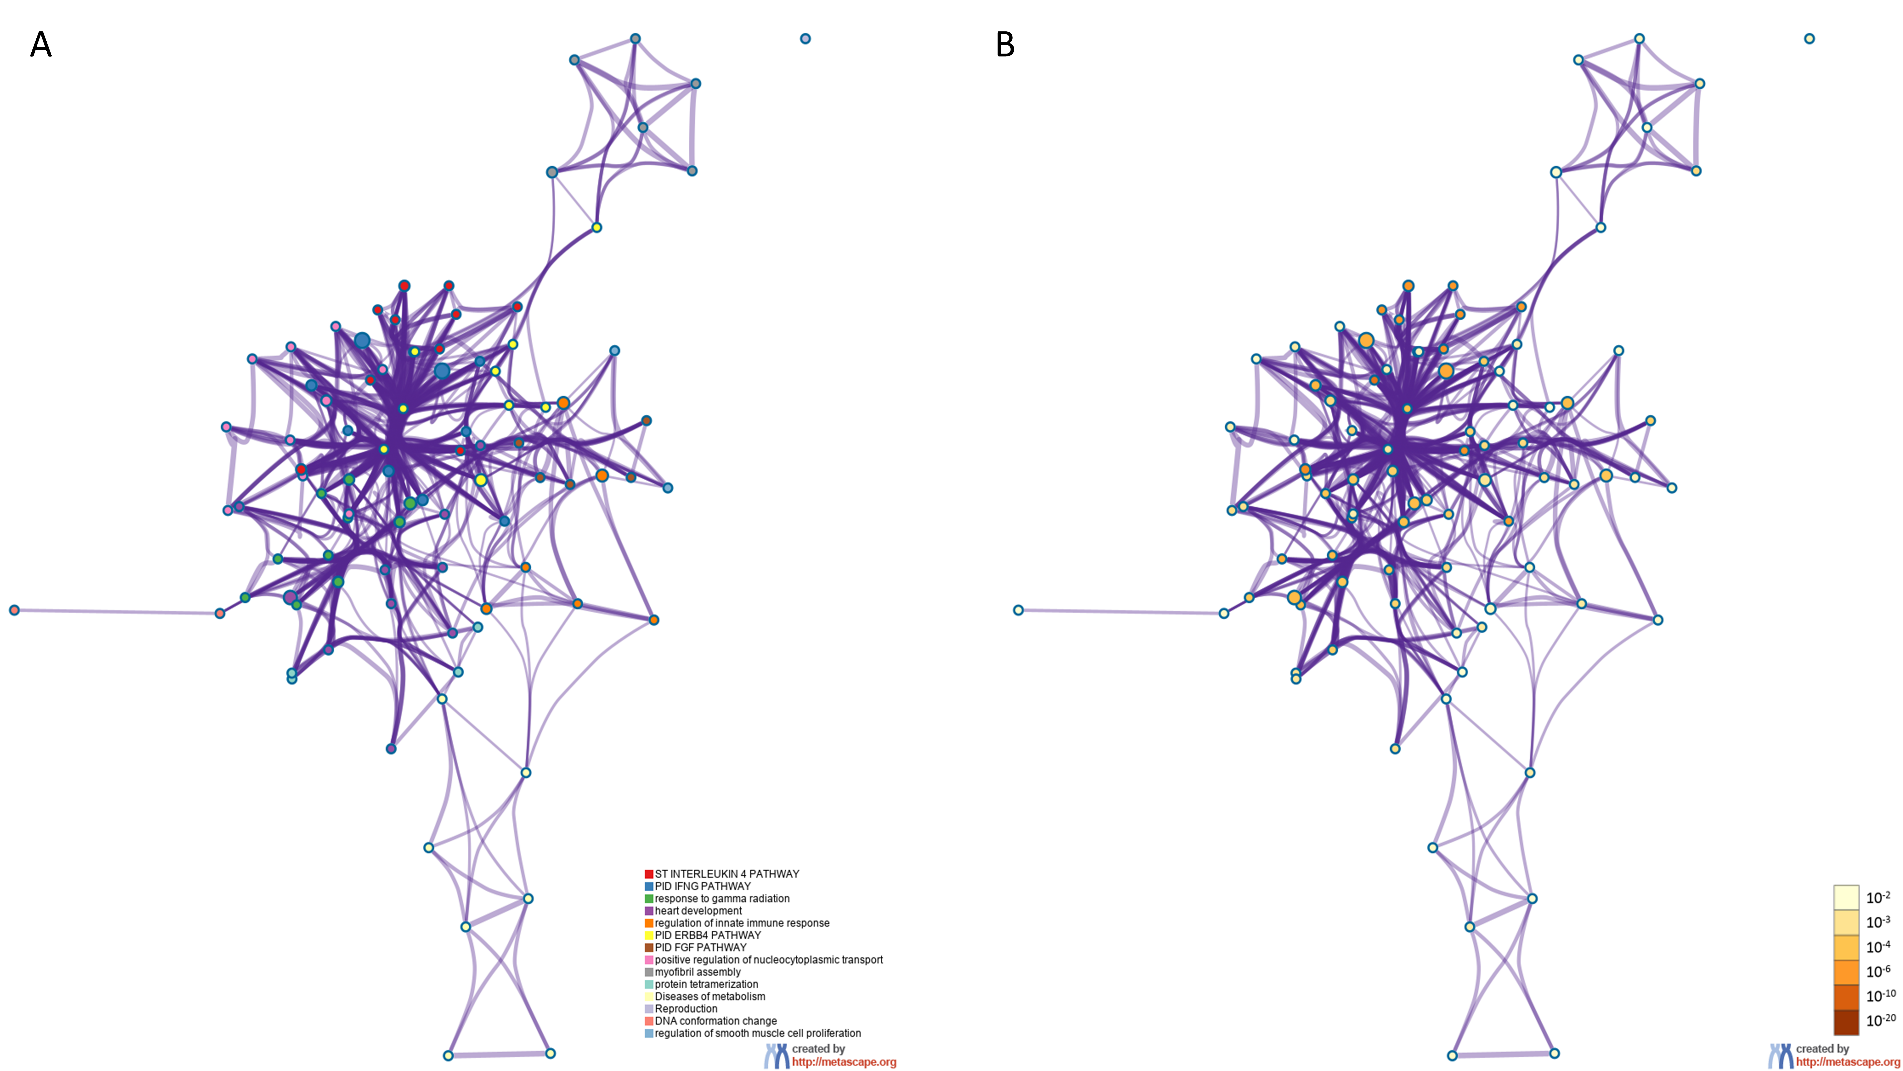


**Supplementary Figure 11** Protein-protein interaction network (**A**) and MCODE components (**B**) identified in the gene lists.


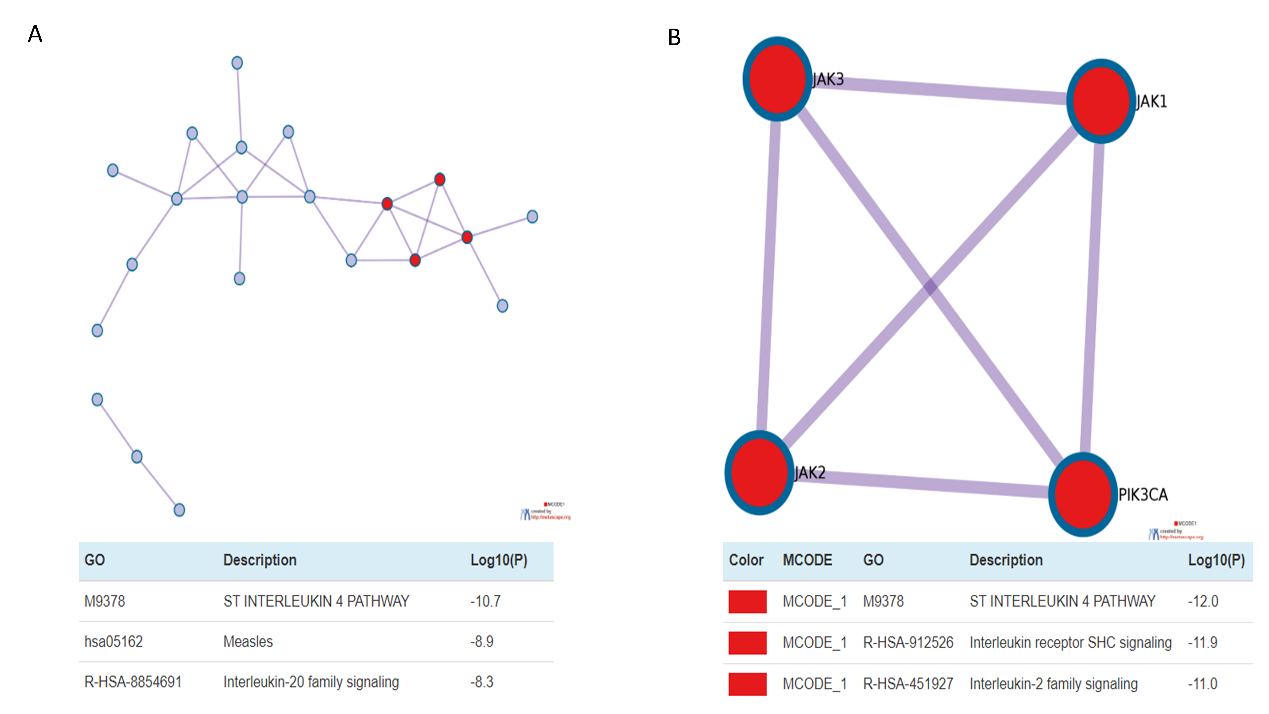


**Supplementary Figure 12** The comparison of tumor infiltration levels among BC with different somatic copy number alterations for JAK1 (**A**), JAK2 (**B**), JAK3 (**C**), TYK2 (**D**).


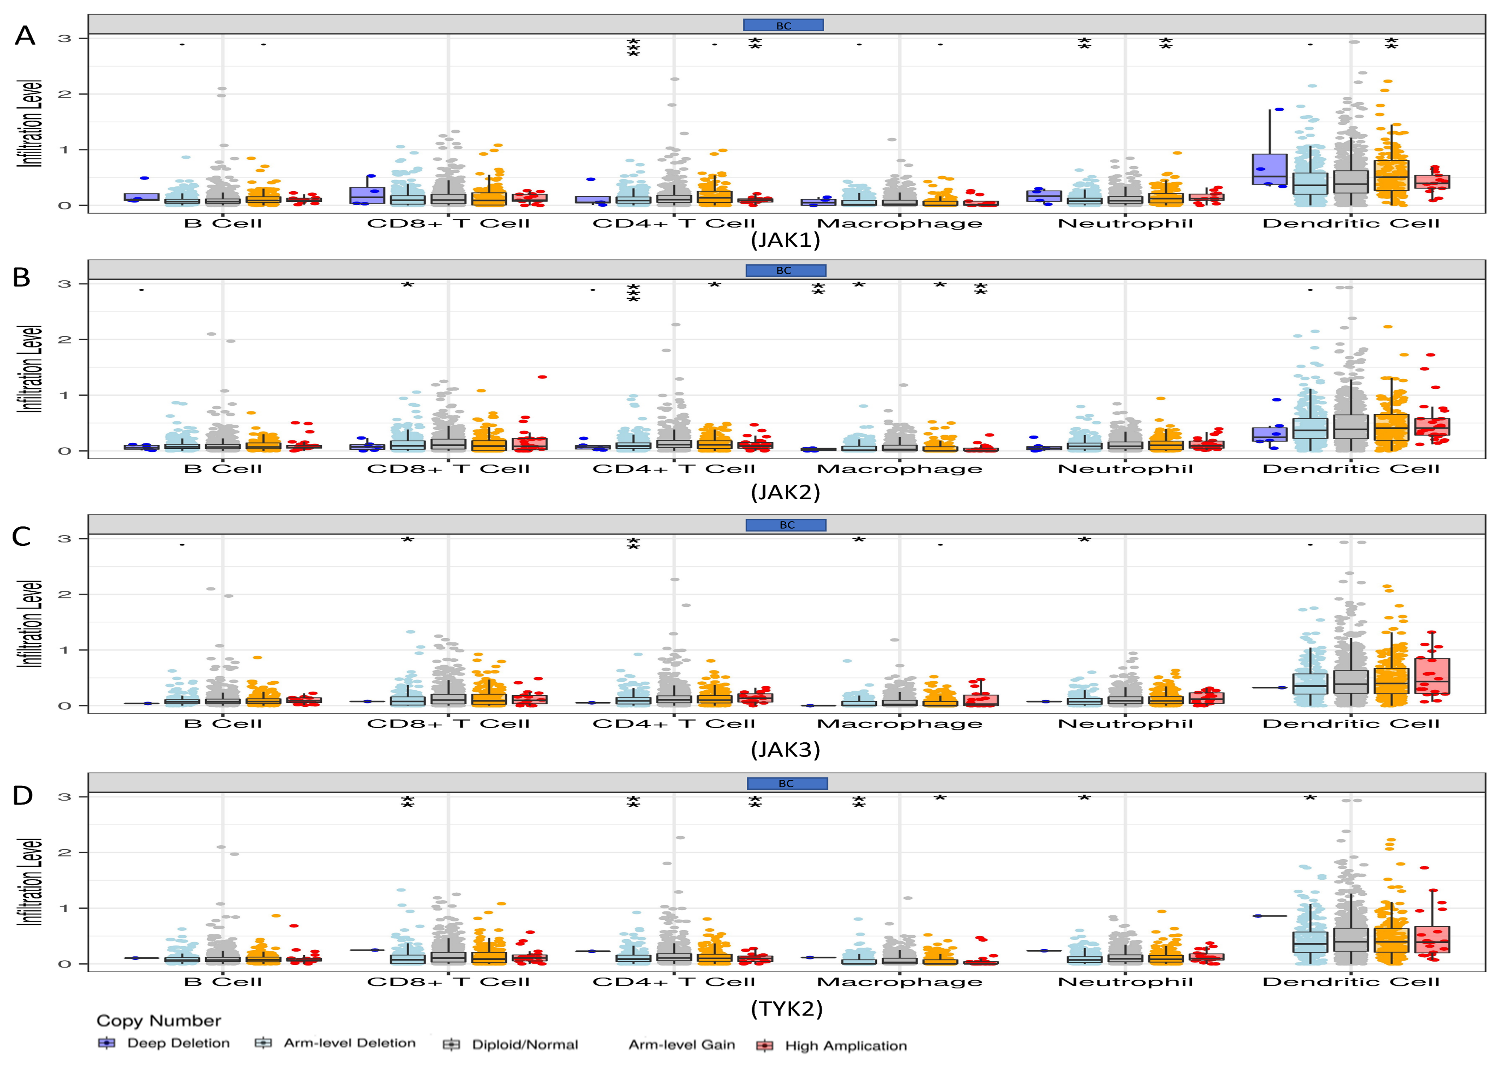


**Supplementary Figure 13** Correlation between the expression of JAK2 and marker genes of infiltrating immune cells in BC using the TIMER database. (**A**) Correlation between the expression of JAK2 and immune molecular genes. NS >0.05; *P < 0.05; **P < 0.01; ***P < 0.001; ****P < 0.0001. (**B**) The scatter plots of correlation between JAK2 expression and the gene markers of TAMs, Natural killer cell, Dendritic cell, CD8+ T cell, T cell (general), Th1, Tfh, Th17, Treg, and T cell exhaustion in BC.


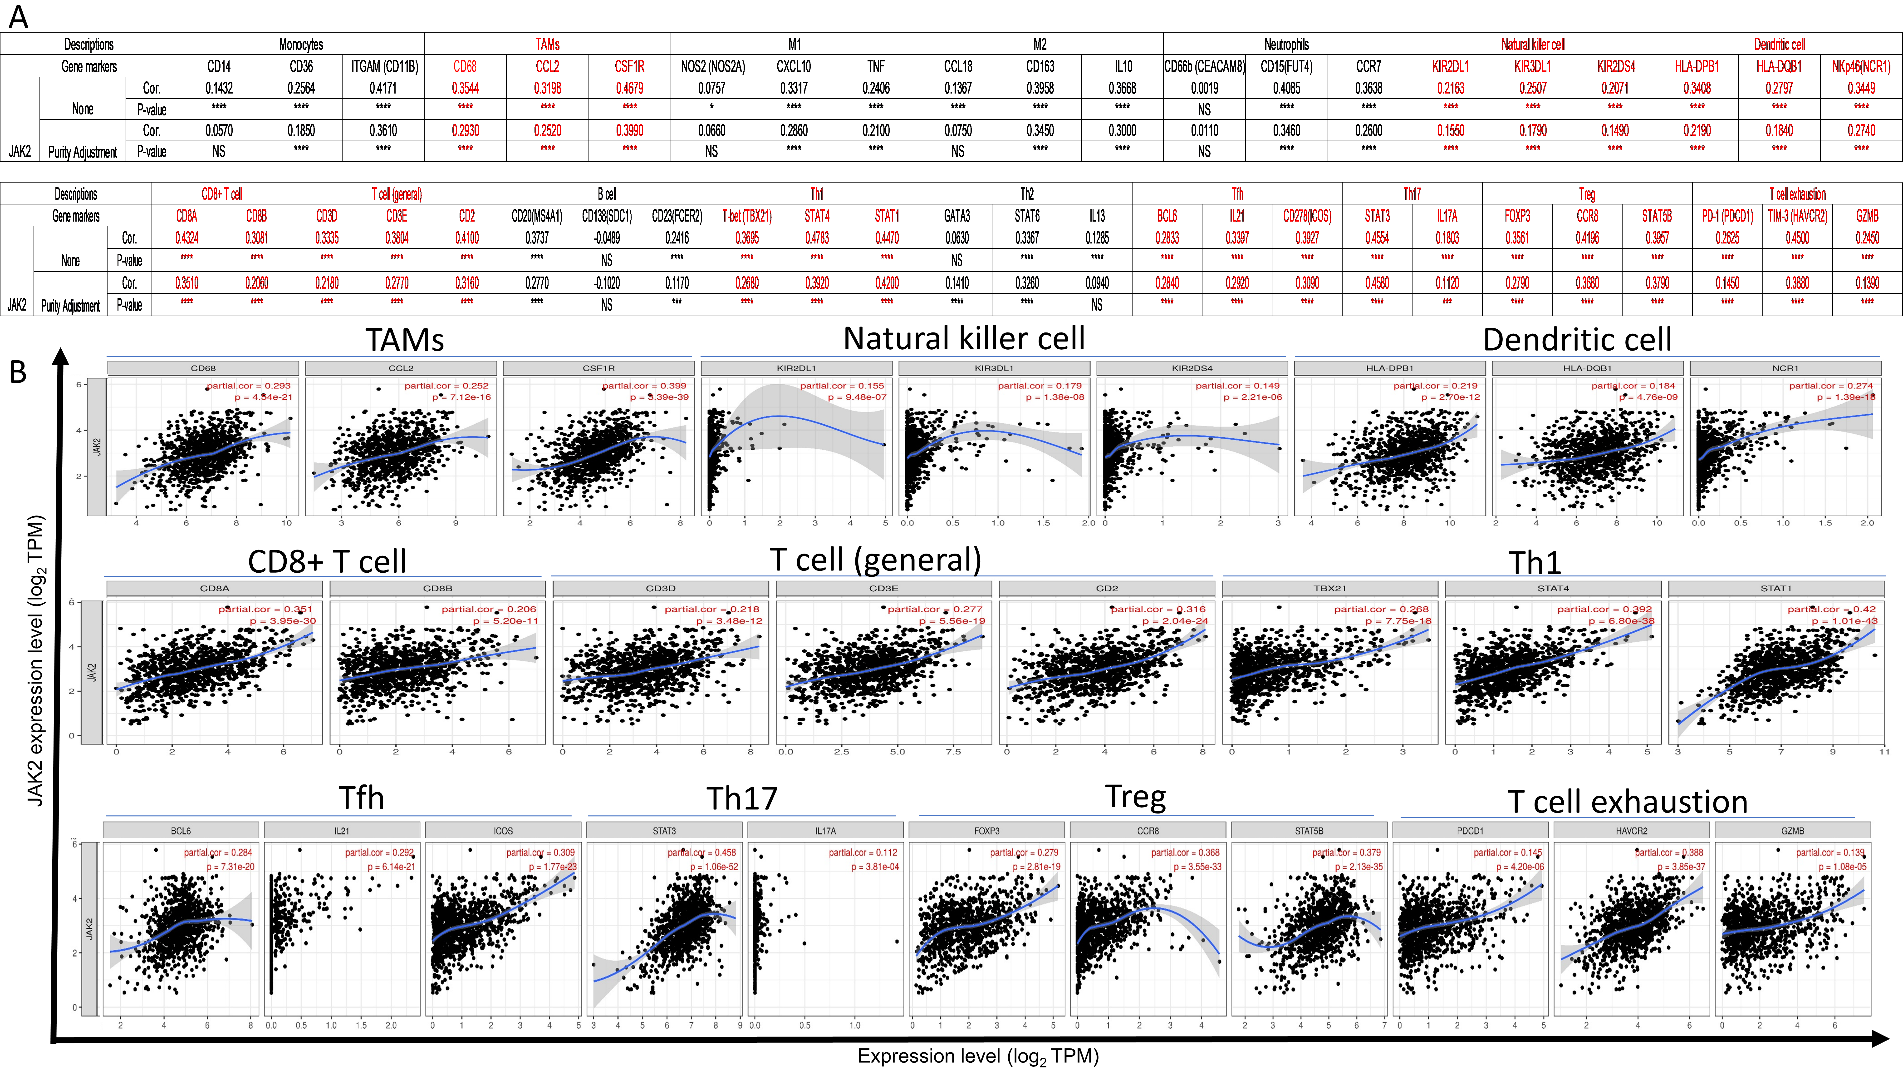


**Supplementary Figure 14** Correlation between the expression of JAK3 and marker genes of infiltrating immune cells in BC using the TIMER database. (**A**) Correlation between the expression of JAK3 and immune molecular genes. NS >0.05; *P < 0.05; **P < 0.01; ***P < 0.001; ****P < 0.0001. (**B**) The scatter plots of correlation between JAK3 expression and the gene markers of TAMs, M2, Natural killer cell, Dendritic cell, CD8+ T cell, T cell (general), Th1 and T cell exhaustion in BC.


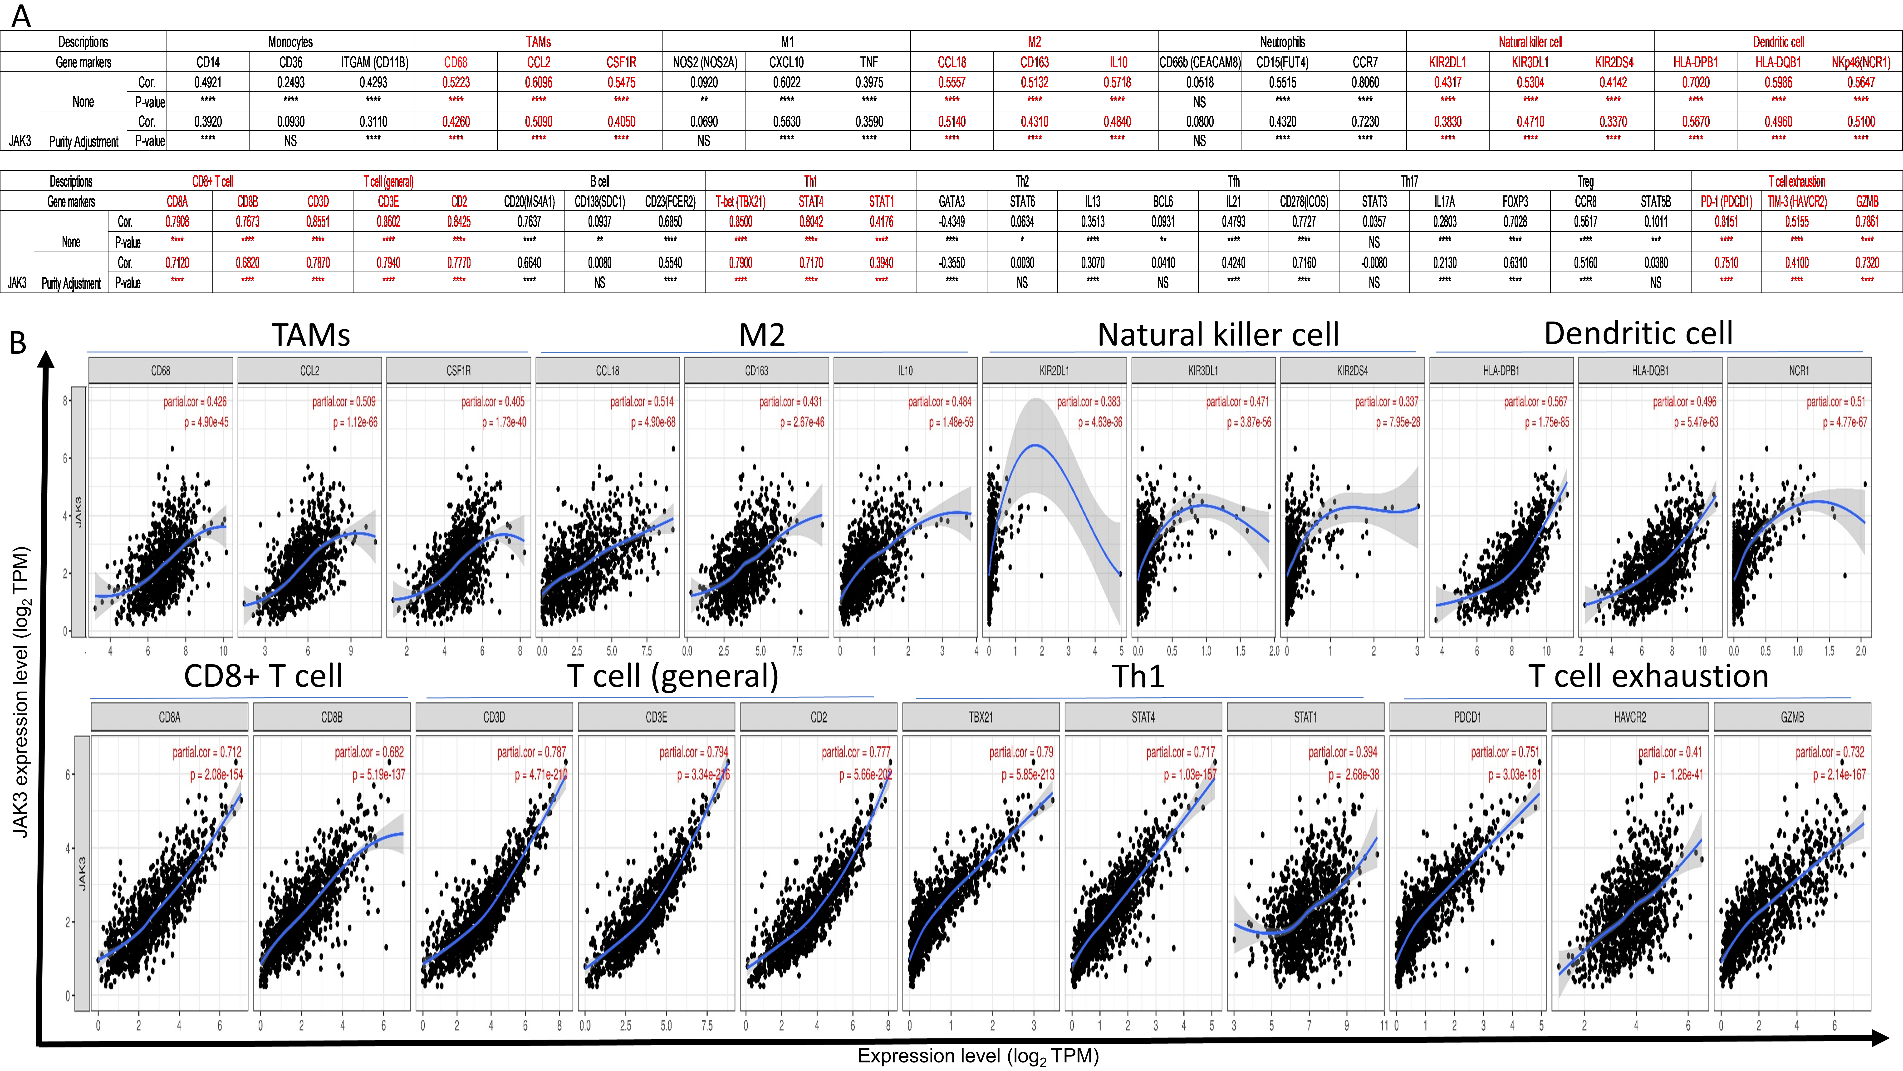


**Supplementary Figure 15** Correlation between the expression of TYK2 and marker genes of infiltrating immune cells in BC using the TIMER database. (**A**) Correlation between the expression of TYK2 and immune molecular genes. NS >0.05; *P < 0.05; **P < 0.01; ***P < 0.001; ****P < 0.0001. (**B**) The scatter plots of correlation between TYK2 expression and the gene markers of Dendritic cell, CD8+ T cell, T cell (general), Th2, Treg, and T cell exhaustion in BC.


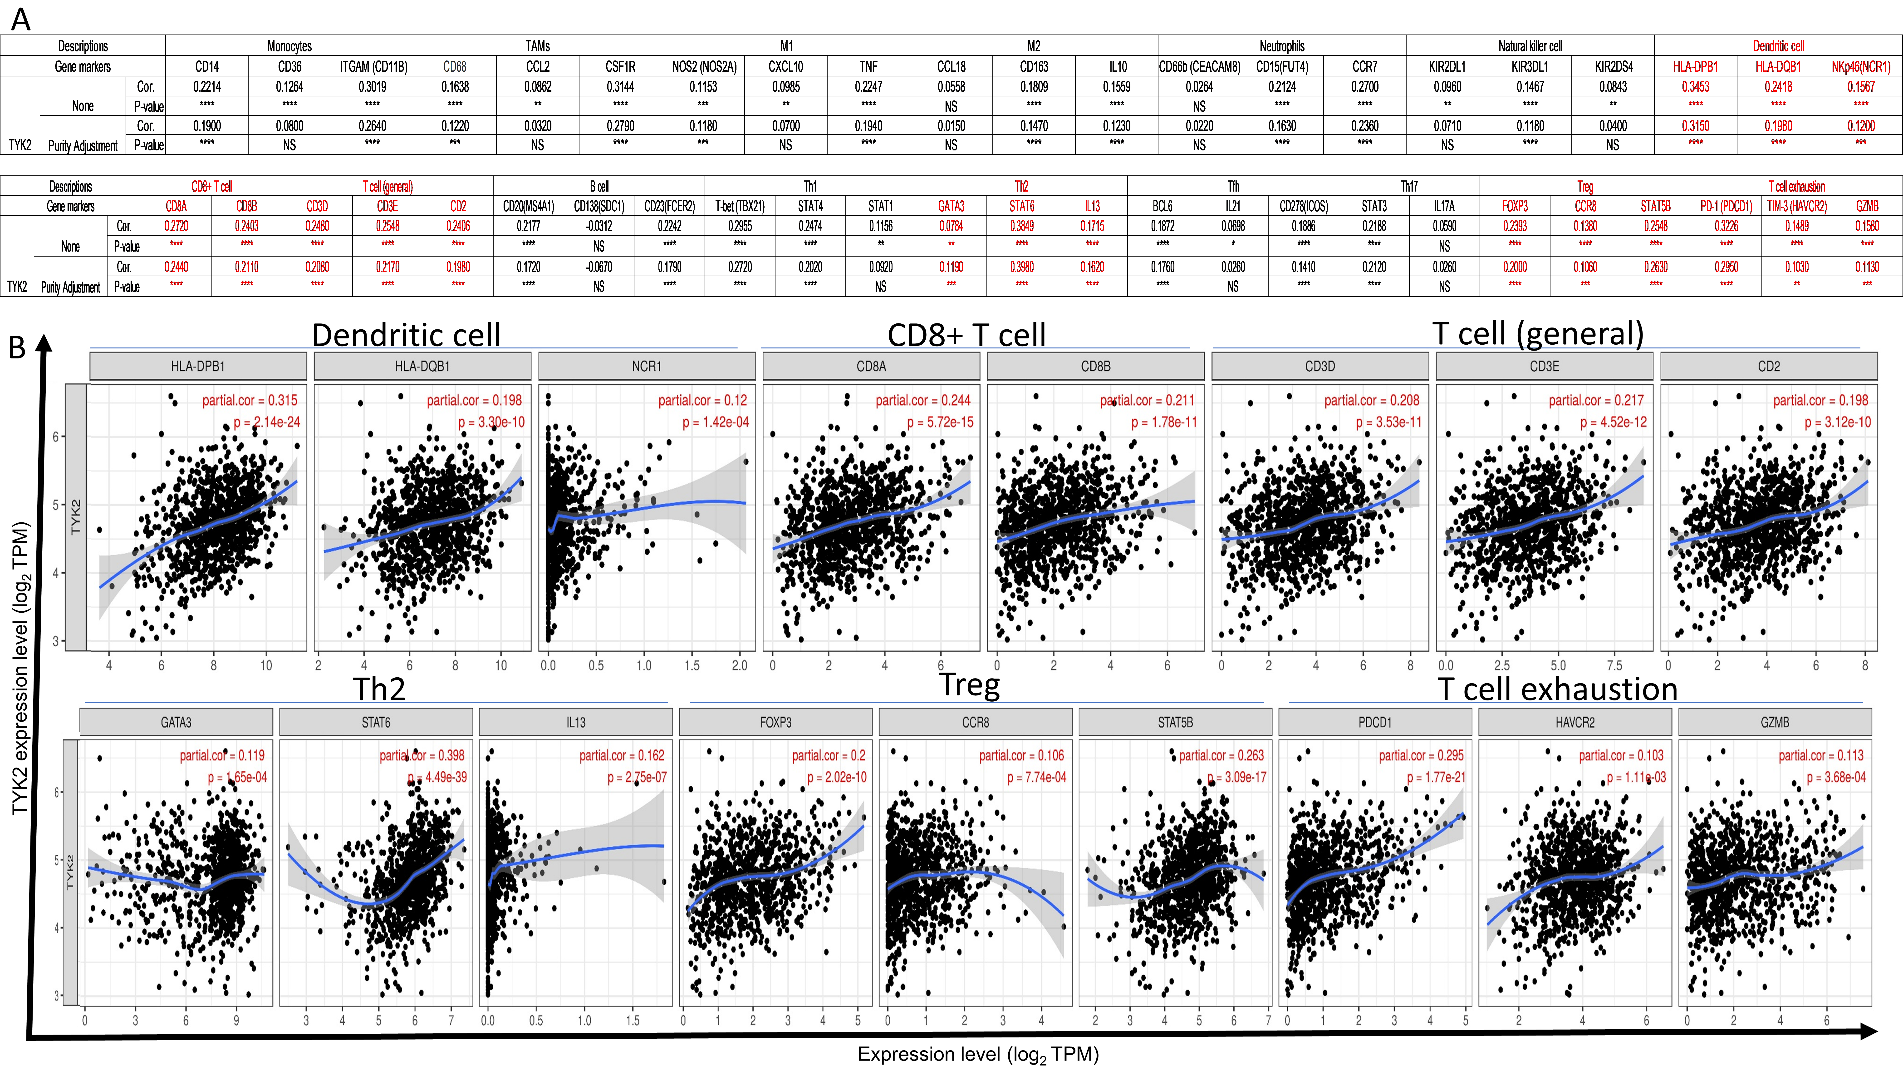


**Supplementary Table 1** Correlation of JAK1 mRNA expression and clinicopathological factors in breast cancer by Kaplan-Meier plotter database.

| **Groups** | **Variables** | **OS** | | | **DMFS** | | | **PPS** | | | **RFS** | | |
| --- | --- | --- | --- | --- | --- | --- | --- | --- | --- | --- | --- | --- | --- |
| **N** | **Hazard ratio** | **P-value** | **N** | **Hazard ratio** | **P-value** | **N** | **Hazard ratio** | **P-value** | **N** | **Hazard ratio** | **P-value** |
| **ER status** | **ER positive** | 548 | 0.58 (0.41 − 0.83) | 0.0028 | 664 | 0.57 (0.4 − 0.8) | 0.0012 | 173 | 0.75 (0.5 − 1.12) | 0.15 | 3951 | 0.83 (0.7 − 0.98) | 0.027 |
|  | **ER negative** | 251 | 0.61 (0.39 − 0.98) | 0.038 | 218 | 1.34 (0.85 − 2.13) | 0.21 | 100 | 0.96 (0.57 − 1.62) | 0.87 | 801 | 1.02 (0.81 − 1.28) | 0.86 |
| **PR status** | **PR positive** | 83 | 0.1 (0.01 − 0.78) | 0.0064 | 192 | 0.31 (0.12 − 0.78) | 0.0082 | 13 | - | | 589 | 0.87 (0.61 − 1.23) | 0.42 |
|  | **PR negative** | 89 | 1.07 (0.43 − 2.7) | 0.88 | 154 | 1.72 (0.95 − 3.1) | 0.069 | 17 | - | | 549 | 0.94 (0.71 − 1.26) | 0.69 |
| **HER2 status** | **HER2 positive** | 129 | 0.93 (0.46 − 1.89) | 0.84 | 126 | 1.26 (0.67 − 2.4) | 0.47 | 33 | 1.83 (0.69 − 4.82) | 0.22 | 252 | 1.29 (0.83 − 2) | 0.25 |
|  | **HER2 negative** | 130 | 0.82 (0.35 − 1.94) | 0.65 | 150 | 0.35 (0.14 − 0.92) | 0.025 | 39 | 1.26 (0.46 − 3.48) | 0.66 | 800 | 0.66 (0.51 − 0.86) | 0.002 |
| **Intrinsic subtype** | **basal** | 241 | 0.47 (0.28 − 0.78) | 0.003 | 232 | 0.6 (0.36 − 1.01) | 0.052 | 64 | 0.62 (0.34 − 1.11) | 0.1 | 618 | 0.92 (0.71 − 1.18) | 0.49 |
|  | **luminal A** | 611 | 0.72 (0.51 − 1.03) | 0.07 | 965 | 0.64 (0.48 − 0.86) | 0.0029 | 179 | 1.07 (0.73 − 1.58) | 0.72 | 1933 | 0.71 (0.6 − 0.84) | 0.00008 |
|  | **luminal B** | 433 | 0.61 (0.42 − 0.89) | 0.01 | 430 | 0.63 (0.44 − 0.9) | 0.01 | 134 | 1.04 (0.68 − 1.6) | 0.84 | 1149 | 0.86 (0.71 − 1.05) | 0.13 |
|  | **HER2+** | 117 | 0.53 (0.27 − 1.03) | 0.058 | 119 | 1.51 (0.8 − 2.82) | 0.2 | 37 | 0.49 (0.23 − 1.05) | 0.061 | 251 | 1.22 (0.83 − 1.79) | 0.31 |
| **Lymph node status** | **Lymph node positive** | 313 | 0.59 (0.4 − 0.88) | 0.0089 | 382 | 1.01 (0.68 − 1.48) | 0.98 | 128 | 0.64 (0.41 − 1.01) | 0.052 | 1133 | 0.77 (0.63 − 0.94) | 0.0098 |
|  | **Lymph node negative** | 594 | 0.57 (0.39 − 0.84) | 0.0035 | 988 | 0.67 (0.51 − 0.88) | 0.0034 | 165 | 0.72 (0.46 − 1.1) | 0.13 | 2020 | 0.86 (0.73 − 1.02) | 0.078 |
| **Grade** | **1** | 161 | 0.84 (0.34 − 2.05) | 0.7 | 188 | 0.81 (0.35 − 1.86) | 0.62 | 34 | 0.73 (0.27 − 1.97) | 0.53 | 345 | 0.57 (0.34 − 0.98) | 0.0384 |
|  | **2** | 387 | 0.49 (0.31 − 0.76) | 0.0013 | 546 | 0.66 (0.47 − 0.94) | 0.02 | 128 | 0.69 (0.42 − 1.13) | 0.14 | 901 | 0.64 (0.5 − 0.81) | 0.0003 |
|  | **3** | 503 | 0.71 (0.51 − 0.99) | 0.044 | 458 | 0.8 (0.57 − 1.13) | 0.21 | 165 | 0.72 (0.49 − 1.05) | 0.088 | 903 | 0.89 (0.71 − 1.1) | 0.2783 |
| **TP53 status** | **mutated** | 111 | 0.58 (0.27 − 1.27) | 0.17 | 83 | 1.32 (0.55 − 3.19) | 0.54 | 34 | 0.74 (0.31 − 1.76) | 0.5 | 188 | 0.92 (0.57 − 1.47) | 0.72 |
|  | **wild type** | 187 | 0.46 (0.23 − 0.9) | 0.021 | 109 | 0.42 (0.19 − 0.94) | 0.03 | 62 | 0.6 (0.3 − 1.21) | 0.15 | 273 | 0.69 (0.45 − 1.05) | 0.0837 |
| **Pietenpol subtype** | **basal-like 1** | 58 | 0.61 (0.2 − 1.89) | 0.39 | 65 | 1.07 (0.41 − 2.79) | 0.88 | 17 | - | | 171 | 1.11 (0.69 − 1.79) | 0.67 |
|  | **basal-like 2** | 38 | 2.47 (0.64 − 9.61) | 0.18 | 39 | 1.77 (0.64 − 4.87) | 0.27 | 14 | - | | 76 | 1.54 (0.76 − 3.15) | 0.23 |
|  | **immunomodulatory** | 100 | 1.54 (0.57 − 4.12) | 0.39 | 96 | 1.18 (0.47 − 2.94) | 0.72 | 17 | - | | 203 | 1.34 (0.74 − 2.41) | 0.33 |
|  | **mesenchymal** | 73 | 1 (0.46 − 2.19) | 1 | 65 | 0.8 (0.33 − 1.92) | 0.61 | 24 | 1.15 (0.47 − 2.82) | 0.76 | 177 | 0.79 (0.52 − 1.21) | 0.28 |
|  | **mesenchymal stem like** | 19 | - | | 17 | - | | 4 | - | | 63 | 1.76 (0.79 − 3.89) | 0.16 |
|  | **luminal androgen receptor** | 83 | 0.37 (0.18 − 0.77) | 0.0058 | 82 | 0.57 (0.26 − 1.24) | 0.15 | 32 | 0.47 (0.2 − 1.12) | 0.081 | 203 | 1.06 (0.71 − 1.59) | 0.78 |
| **Treatment** | **systemically untreated patients included** | 382 | 0.61 (0.39 − 0.96) | 0.032 | 543 | 0.65 (0.46 − 0.91) | 0.012 | 137 | 0.7 (0.44 − 1.12) | 0.13 | 1010 | 0.65 (0.52 − 0.8) | 5.9e−05 |
|  | **systemically untreated patients excluded** | 473 | 0.73 (0.5 − 1.06) | 0.097 | 862 | 0.87 (0.65 − 1.16) | 0.34 | 117 | 0.83 (0.52 − 1.32) | 0.43 | 1881 | 1.15 (0.99 − 1.35) | 0.074 |
|  | **patients with following systemic treatment （endocrine therapy:include）** | 215 | 0.75 (0.44 − 1.29) | 0.29 | 645 | 0.62 (0.44 − 0.88) | 0.0072 | 57 | 1.56 (0.78 − 3.13) | 0.2 | 1064 | 0.85 (0.67 − 1.09) | 0.19 |
|  | **patients with following systemic treatment （endocrine therapy:exclude）** | 631 | 0.55 (0.39 − 0.78) | 0.00062 | 762 | 0.81 (0.61 − 1.07) | 0.14 | 197 | 0.66 (0.45 − 0.96) | 0.029 | 1616 | 0.78 (0.65 − 0.93) | 0.0047 |
|  | **patients with following systemic treatment （tamoxifen only）** | 146 | 0.89 (0.44 − 1.78) | 0.74 | 629 | 0.62 (0.44 − 0.89) | 0.009 | 37 | 1.48 (0.61 − 3.6) | 0.38 | 809 | 0.83 (0.62 − 1.1) | 0.2 |
|  | **patients with following systemic treatment （chemotherapy: include all）** | 300 | 0.83 (0.51 − 1.36) | 0.46 | 305 | 1.25 (0.78 − 2) | 0.35 | 65 | 0.57 (0.3 − 1.07) | 0.077 | 798 | 1.03 (0.79 − 1.35) | 0.83 |
|  | **patients with following systemic treatment （chemotherapy: adjuvant only）** | 163 | 0.69 (0.38 − 1.25) | 0.22 | 197 | 1.3 (0.73 − 2.31) | 0.38 | 48 | 0.85 (0.42 − 1.74) | 0.66 | 594 | 1.07 (0.79 − 1.45) | 0.65 |
|  | **patients with following systemic treatment （neoadjuvant only: adjuvant only）** | 156 | 0.84 (0.38 − 1.81) | 0.65 | 108 | 1.53 (0.67 − 3.46) | 0.31 | 17 | - | | 223 | 1.05 (0.6 − 1.82) | 0.87 |
|  | **patients with following systemic treatment （chemotherapy: exclude all）** | 549 | 0.58 (0.4 − 0.83) | 0.0023 | 1100 | 0.62 (0.48 − 0.8) | 0.00016 | 189 | 0.83 (0.56 − 1.22) | 0.35 | 1873 | 0.8 (0.68 − 0.94) | 0.0079 |

**Supplementary Table 2** Correlation of JAK2 mRNA expression and clinicopathological factors in breast cancer by Kaplan-Meier plotter database.

| **Groups** | **Variables** | **OS** | | | **DMFS** | | | **PPS** | | | **RFS** | | |
| --- | --- | --- | --- | --- | --- | --- | --- | --- | --- | --- | --- | --- | --- |
| **N** | **Hazard ratio** | **P-value** | **N** | **Hazard ratio** | **P-value** | **N** | **Hazard ratio** | **P-value** | **N** | **Hazard ratio** | **P-value** |
| **ER status** | **ER positive** | 548 | 0.74 (0.52 − 1.06) | 0.099 | 664 | 0.79 (0.56 − 1.1) | 0.16 | 173 | 0.96 (0.64 − 1.43) | 0.84 | 2061 | 0.88 (0.74 − 1.03) | 0.11 |
|  | **ER negative** | 251 | 0.64 (0.4 − 1.02) | 0.056 | 218 | 0.62 (0.39 − 1) | 0.048 | 100 | 0.67 (0.39 − 1.12) | 0.13 | 801 | 0.82 (0.65 − 1.02) | 0.079 |
| **PR status** | **PR positive** | 83 | 0.3 (0.06 − 1.45) | 0.11 | 192 | 0.94 (0.42 − 2.13) | 0.89 | 13 | - | | 589 | 0.85 (0.6 − 1.2) | 0.35 |
|  | **PR negative** | 89 | 0.51 (0.19 − 1.36) | 0.17 | 154 | 0.73 (0.41 − 1.31) | 0.3 | 17 | - | | 549 | 0.7 (0.52 − 0.93) | 0.015 |
| **HER2 status** | **HER2 positive** | 129 | 0.79 (0.39 − 1.6) | 0.51 | 126 | 0.87 (0.46 − 1.64) | 0.66 | 33 | 0.81 (0.31 − 2.12) | 0.67 | 252 | 0.95 (0.62 − 1.47) | 0.82 |
|  | **HER2 negative** | 130 | 0.48 (0.2 − 1.16) | 0.096 | 150 | 0.28 (0.1 − 0.77) | 0.0084 | 39 | 0.74 (0.28 − 1.98) | 0.55 | 800 | 0.85 (0.65 − 1.1) | 0.22 |
| **Intrinsic subtype** | **basal** | 241 | 0.45 (0.26 − 0.76) | 0.0023 | 232 | 0.42 (0.24 − 0.73) | 0.0015 | 64 | 0.8 (0.45 − 1.43) | 0.45 | 618 | 0.66 (0.51 − 0.85) | 0.0013 |
|  | **luminal A** | 611 | 1.1 (0.77 − 1.57) | 0.6 | 965 | 1.12 (0.84 − 1.49) | 0.45 | 179 | 1.2 (0.81 − 1.77) | 0.36 | 1933 | 0.97 (0.82 − 1.15) | 0.74 |
|  | **luminal B** | 433 | 0.63 (0.43 − 0.91) | 0.013 | 430 | 0.59 (0.42 − 0.85) | 0.004 | 134 | 1.25 (0.81 − 1.92) | 0.31 | 1149 | 0.9 (0.74 − 1.09) | 0.29 |
|  | **HER2+** | 117 | 1.08 (0.56 − 2.05) | 0.82 | 119 | 1.01 (0.54 − 1.88) | 0.98 | 37 | 1.26 (0.6 − 2.65) | 0.54 | 251 | 0.69 (0.47 − 1.02) | 0.06 |
| **Lymph node status** | **Lymph node positive** | 313 | 0.59 (0.4 − 0.88) | 0.0092 | 382 | 0.94 (0.64 − 1.39) | 0.76 | 128 | 0.5 (0.32 − 0.79) | 0.0025 | 1133 | 0.8 (0.65 − 0.97) | 0.023 |
|  | **Lymph node negative** | 594 | 0.92 (0.63 − 1.33) | 0.64 | 988 | 0.91 (0.69 − 1.19) | 0.48 | 165 | 1.02 (0.66 − 1.56) | 0.94 | 2020 | 0.9 (0.76 − 1.07) | 0.22 |
| **Grade** | **1** | 161 | 1.61 (0.66 − 3.97) | 0.29 | 188 | 0.93 (0.41 − 2.11) | 0.86 | 34 | 2.5 (0.84 − 7.46) | 0.089 | 345 | 1.03 (0.62 − 1.73) | 0.91 |
|  | **2** | 387 | 0.8 (0.52 − 1.22) | 0.3 | 546 | 0.83 (0.59 − 1.18) | 0.3 | 128 | 0.8 (0.49 − 1.29) | 0.36 | 901 | 0.84 (0.66 − 1.06) | 0.15 |
|  | **3** | 503 | 0.7 (0.5 − 0.98) | 0.035 | 458 | 0.79 (0.56 − 1.12) | 0.18 | 165 | 0.81 (0.55 − 1.18) | 0.27 | 903 | 0.85 (0.69 − 1.06) | 0.15 |
| **TP53 status** | **mutated** | 111 | 0.85 (0.4 − 1.83) | 0.68 | 83 | 0.96 (0.39 − 2.33) | 0.92 | 37 | 0.58 (0.24 − 1.42) | 0.23 | 188 | 0.73 (0.46 − 1.18) | 0.2 |
|  | **wild type** | 187 | 0.77 (0.4 − 1.48) | 0.43 | 109 | 0.75 (0.34 − 1.64) | 0.47 | 62 | 1.06 (0.53 − 2.1) | 0.87 | 273 | 0.67 (0.44 − 1.03) | 0.066 |
| **Pietenpol subtype** | **basal-like 1** | 58 | 0.41 (0.13 − 1.34) | 0.13 | 65 | 0.44 (0.16 − 1.26) | 0.12 | 17 | - | | 171 | 0.88 (0.54 − 1.42) | 0.59 |
|  | **basal-like 2** | 38 | 3.45 (0.88 − 13.56) | 0.06 | 39 | 0.86 (0.32 − 2.31) | 0.76 | 14 | - | | 76 | 0.95 (0.47 − 1.92) | 0.88 |
|  | **immunomodulatory** | 100 | 0.75 (0.3 − 1.9) | 0.54 | 96 | 0.55 (0.22 − 1.41) | 0.21 | 17 | - | | 203 | 1.04 (0.58 − 1.87) | 0.9 |
|  | **mesenchymal** | 73 | 0.88 (0.4 − 1.93) | 0.75 | 65 | 0.86 (0.36 − 2.08) | 0.74 | 24 | 0.86 (0.36 − 2.09) | 0.74 | 177 | 0.88 (0.57 − 1.35) | 0.55 |
|  | **mesenchymal stem like** | 19 | - | | 17 | - | | 4 | - | | 63 | 0.93 (0.42 − 2.05) | 0.86 |
|  | **luminal androgen receptor** | 83 | 0.92 (0.47 − 1.81) | 0.82 | 82 | 0.42 (0.19 − 0.94) | 0.029 | 32 | 1.83 (0.8 − 4.21) | 0.15 | 203 | 0.73 (0.48 − 1.09) | 0.12 |
| **Treatment** | **systemically untreated patients included** | 382 | 0.77 (0.49 − 1.19) | 0.24 | 543 | 0.82 (0.59 − 1.14) | 0.23 | 137 | 0.98 (0.62 − 1.56) | 0.95 | 1010 | 0.87 (0.7 − 1.07) | 0.19 |
|  | **systemically untreated patients excluded** | 473 | 0.82 (0.57 − 1.19) | 0.3 | 862 | 0.96 (0.72 − 1.29) | 0.81 | 117 | 0.79 (0.5 − 1.27) | 0.34 | 1881 | 1.12 (0.96 − 1.3) | 0.17 |
|  | **patients with following systemic treatment （endocrine therapy:include）** | 215 | 0.89 (0.52 − 1.53) | 0.68 | 645 | 0.77 (0.55 − 1.09) | 0.14 | 52 | 0.7 (0.35 − 1.43) | 0.33 | 1064 | 1.09 (0.85 − 1.39) | 0.49 |
|  | **patients with following systemic treatment （endocrine therapy:exclude）** | 631 | 0.95 (0.68 − 1.33) | 0.75 | 762 | 0.92 (0.69 − 1.21) | 0.54 | 137 | 0.98 (0.62 − 1.56) | 0.95 | 1616 | 0.91 (0.76 − 1.08) | 0.27 |
|  | **patients with following systemic treatment （tamoxifen only）** | 146 | 0.57 (0.28 − 1.19) | 0.13 | 629 | 0.74 (0.52 − 1.05) | 0.091 | 33 | 1.15 (0.45 − 2.91) | 0.77 | 809 | 0.79 (0.59 − 1.05) | 0.1 |
|  | **patients with following systemic treatment （chemotherapy: include all）** | 300 | 0.74 (0.45 − 1.21) | 0.22 | 305 | 0.89 (0.56 − 1.42) | 0.62 | 65 | 1.08 (0.58 − 2.01) | 0.81 | 798 | 0.86 (0.66 − 1.13) | 0.29 |
|  | **patients with following systemic treatment （chemotherapy: adjuvant only）** | 163 | 0.74 (0.4 − 1.34) | 0.31 | 197 | 0.81 (0.46 − 1.45) | 0.48 | 48 | 1.02 (0.51 − 2.05) | 0.94 | 594 | 0.77 (0.57 − 1.04) | 0.088 |
|  | **patients with following systemic treatment （neoadjuvant only: adjuvant only）** | 156 | 0.93 (0.42 − 2.03) | 0.85 | 108 | 0.74 (0.33 − 1.67) | 0.46 | 17 | - | | 223 | 1.26 (0.72 − 2.18) | 0.42 |
|  | **patients with following systemic treatment （chemotherapy: exclude all）** | 549 | 0.88 (0.62 − 1.25) | 0.47 | 1100 | 0.8 (0.63 − 1.02) | 0.076 | 189 | 0.93 (0.63 − 1.37) | 0.73 | 1873 | 0.9 (0.76 − 1.06) | 0.2 |

**Supplementary Table 3** Correlation of JAK3 mRNA expression and clinicopathological factors in breast cancer by Kaplan-Meier plotter database.

| **Groups** | **Variables** | **OS** | | | **DMFS** | | | **PPS** | | | **RFS** | | |
| --- | --- | --- | --- | --- | --- | --- | --- | --- | --- | --- | --- | --- | --- |
| **N** | **Hazard ratio** | **P-value** | **N** | **Hazard ratio** | **P-value** | **N** | **Hazard ratio** | **P-value** | **N** | **Hazard ratio** | **P-value** |
| **ER status** | **ER positive** | 109 | 0.94 (0.44 − 2) | 0.87 | 161 | 0.86 (0.34 − 2.18) | 0.75 | 32 | 0.7 (0.28 − 1.7) | 0.42 | 762 | 0.81 (0.61 − 1.08) | 0.15 |
|  | **ER negative** | 79 | 0.69 (0.34 − 1.4) | 0.3 | 68 | 0.96 (0.41 − 2.24) | 0.92 | 41 | 1.32 (0.6 − 2.91) | 0.49 | 347 | 0.69 (0.49 − 0.96) | 0.028 |
| **PR status** | **PR positive** | 0 | - | | 122 | 0.85 (0.26 − 2.79) | 0.79 | 13 | - | | 489 | 1.04 (0.71 − 1.52) | 0.84 |
|  | **PR negative** | 0 | - | | 95 | 1.12 (0.53 − 2.35) | 0.77 | 17 | - | | 372 | 0.81 (0.57 − 1.16) | 0.26 |
| **HER2 status** | **HER2 positive** | 26 | 0.31 (0.08 − 1.2) | 0.074 | 66 | 1.02 (0.41 − 2.58) | 0.96 | 15 | 0.39 (0.11 − 1.36) | 0.13 | 150 | 1.01 (0.59 − 1.74) | 0.97 |
|  | **HER2 negative** | 62 | 1.49 (0.52 − 4.3) | 0.46 | 82 | 0.64 (0.18 − 2.28) | 0.49 | 27 | 2.03 (0.7 − 5.88) | 0.18 | 635 | 0.83 (0.61 − 1.11) | 0.21 |
| **Intrinsic subtype** | **basal** | 153 | 0.28 (0.14 − 0.57) | 0.00016 | 145 | 0.45 (0.21 − 0.93) | 0.028 | 33 | 0.44 (0.18 − 1.07) | 0.062 | 360 | 0.48 (0.35 − 0.68) | 1.3e−05 |
|  | **luminal A** | 271 | 1.02 (0.61 − 1.68) | 0.95 | 281 | 1.27 (0.73 − 2.19) | 0.4 | 75 | 1.98 (1.12 − 3.5) | 0.017 | 841 | 0.81 (0.63 − 1.03) | 0.087 |
|  | **luminal B** | 129 | 0.56 (0.28 − 1.12) | 0.097 | 156 | 0.7 (0.36 − 1.36) | 0.29 | 37 | 1.22 (0.58 − 2.56) | 0.6 | 407 | 0.49 (0.36 − 0.67) | 5.6e−06 |
|  | **HER2+** | 73 | 0.74 (0.34 − 1.62) | 0.45 | 82 | 0.53 (0.25 − 1.15) | 0.1 | 28 | 1.26 (0.53 − 2.96) | 0.6 | 156 | 0.52 (0.33 − 0.83) | 0.0048 |
| **Lymph node status** | **Lymph node positive** | 177 | 0.78 (0.46 − 1.33) | 0.36 | 172 | 1.06 (0.57 − 1.96) | 0.86 | 72 | 0.96 (0.52 − 1.78) | 0.9 | 724 | 0.95 (0.74 − 1.23) | 0.72 |
|  | **Lymph node negative** | 122 | 1.47 (0.59 − 3.66) | 0.4 | 162 | 0.91 (0.39 − 2.15) | 0.83 | 20 | 1.1 (0.37 − 3.29) | 0.87 | 496 | 0.92 (0.62 − 1.35) | 0.67 |
| **Grade** | **1** | 26 | - | | 39 |  |  | 6 | 0.29 (0.03 − 3.42) | 0.3 | 108 | 0.78 (0.27 − 2.26) | 0.65 |
|  | **2** | 64 | 1.61 (0.51 − 5.09) | 0.41 | 75 | 1.26 (0.46 − 3.48) | 0.66 | 13 | 1.32 (0.24 − 7.35) | 0.75 | 227 | 1.14 (0.68 − 1.89) | 0.62 |
|  | **3** | 204 | 0.54 (0.32 − 0.91) | 0.019 | 198 | 0.8 (0.45 − 1.43) | 0.45 | 72 | 1.11 (0.62 − 2) | 0.72 | 444 | 0.68 (0.5 − 0.94) | 0.018 |
| **TP53 status** | **mutated** | 56 | 0.83 (0.22 − 3.09) | 0.78 | 56 | 0.5 (0.17 − 1.48) | 0.2 | 11 | 1.28 (0.26 − 6.43) | 0.76 | 132 | 0.5 (0.27 − 0.91) | 0.022 |
|  | **wild type** | 6 | - | | 6 |  |  | 0 | - | | 82 | 0.94 (0.4 − 2.2) | 0.89 |
| **Pietenpol subtype** | **basal-like 1** | 37 | 0.14 (0.02 − 1.14) | 0.031 | 40 | - | | 8 | - | | 105 | 0.66 (0.36 − 1.19) | 0.16 |
|  | **basal-like 2** | 28 | 2.9 (0.58 − 14.42) | 0.17 | 30 | 0.94 (0.31 − 2.84) | 0.91 | 12 | - | | 52 | 0.91 (0.4 − 2.06) | 0.82 |
|  | **immunomodulatory** | 59 | 0.59 (0.15 − 2.33) | 0.45 | 60 | 0.78 (0.19 − 3.13) | 0.72 | 7 | - | | 110 | 0.84 (0.36 − 1.95) | 0.69 |
|  | **mesenchymal** | 44 | 0.45 (0.17 − 1.23) | 0.11 | 37 | 0.57 (0.17 − 1.96) | 0.37 | 15 | 0.54 (0.16 − 1.82) | 0.31 | 101 | 0.61 (0.35 − 1.06) | 0.076 |
|  | **mesenchymal stem like** | 15 | - | | 16 | - | | 4 | - | | 33 | 0.96 (0.35 − 2.65) | 0.94 |
|  | **luminal androgen receptor** | 38 | 0.66 (0.24 − 1.77) | 0.4 | 45 | 0.43 (0.14 − 1.3) | 0.12 | 14 | 0.88 (0.25 − 3.07) | 0.83 | 100 | 0.51 (0.29 − 0.87) | 0.013 |
| **Treatment** | **systemically untreated patients included** | 0 | - | | 6 | 0.82 (0.05 − 13.24) | 0.89 | 0 | - | | 61 | 0.3 (0.1 − 0.95) | 0.031 |
|  | **systemically untreated patients excluded** | 107 | 0.66 (0.23 − 1.85) | 0.43 | 324 | 0.99 (0.6 − 1.63) | 0.96 | 17 | 0.63 (0.15 − 2.66) | 0.53 | 751 | 0.78 (0.63 − 0.96) | 0.02 |
|  | **patients with following systemic treatment （endocrine therapy:include）** | 0 | - | | 155 | 0.74 (0.28 − 1.95) | 0.54 | 0 | - | | 335 | 0.98 (0.62 − 1.56) | 0.93 |
|  | **patients with following systemic treatment （endocrine therapy:exclude）** | 107 | 0.66 (0.23 − 1.85) | 0.43 | 177 | 0.97 (0.55 − 1.72) | 0.92 | 17 | 0.63 (0.15 − 2.66) | 0.53 | 275 | 0.84 (0.54 − 1.3) | 0.43 |
|  | **patients with following systemic treatment （tamoxifen only）** | 0 | - | | 141 | 0.87 (0.29 − 2.59) | 0.8 | 0 | - | | 161 | 0.67 (0.27 − 1.66) | 0.38 |
|  | **patients with following systemic treatment （chemotherapy: include all）** | 107 | 0.66 (0.23 − 1.85) | 0.43 | 225 | 0.77 (0.44 − 1.35) | 0.36 | 17 | 0.63 (0.15 − 2.66) | 0.53 | 366 | 0.94 (0.63 − 1.39) | 0.74 |
|  | **patients with following systemic treatment （chemotherapy: adjuvant only）** | 0 | - | | 118 | 0.95 (0.43 − 2.09) | 0.9 | 0 | - | | 255 | 1.28 (0.8 − 2.05) | 0.3 |
|  | **patients with following systemic treatment （neoadjuvant only: adjuvant only）** | 107 | 0.66 (0.23 − 1.85) | 0.43 | 107 | 0.66 (0.29 − 1.49) | 0.32 | 17 | - | | 111 | 0.5 (0.23 − 1.09) | 0.076 |
|  | **patients with following systemic treatment （chemotherapy: exclude all）** | 0 | - | | 106 | 1.34 (0.46 − 3.86) | 0.59 | 17 | - | | 243 | 1.1 (0.64 − 1.9) | 0.73 |

**Supplementary Table 4** Correlation of TYK2 mRNA expression and clinicopathological factors in breast cancer by Kaplan-Meier plotter database.

| **Groups** | **Variables** | | **OS** | | | **DMFS** | | | **PPS** | | | **RFS** | | |
| --- | --- | --- | --- | --- | --- | --- | --- | --- | --- | --- | --- | --- | --- | --- |
| **N** | **Hazard ratio** | **P-value** | **N** | **Hazard ratio** | **P-value** | **N** | **Hazard ratio** | **P-value** | **N** | **Hazard ratio** | **P-value** |
| **ER status** | | **ER positive** | 548 | 0.8 (0.56 − 1.14) | 0.22 | 664 | 1.07 (0.76 − 1.49) | 0.71 | 173 | 1.19 (0.8 − 1.79) | 0.39 | 2061 | 1.04 (0.88 − 1.22) | 0.66 |
|  | | **ER negative** | 251 | 0.72 (0.45 − 1.14) | 0.15 | 218 | 1.13 (0.72 − 1.8) | 0.59 | 100 | 0.89 (0.53 − 1.5) | 0.66 | 801 | 0.95 (0.76 − 1.19) | 0.68 |
| **PR status** | | **PR positive** | 83 | 0.32 (0.07 − 1.58) | 0.14 | 192 | 0.99 (0.43 − 2.24) | 0.97 | 13 | - | | 589 | 1.32 (0.93 − 1.88) | 0.12 |
|  | | **PR negative** | 89 | 1.11 (0.44 − 2.79) | 0.83 | 154 | 1.72 (0.95 − 3.11) | 0.069 | 17 | - | | 549 | 0.96 (0.71 − 1.28) | 0.76 |
| **HER2 status** | | **HER2 positive** | 129 | 0.56 (0.27 − 1.15) | 0.11 | 126 | 1.11 (0.59 − 2.11) | 0.74 | 33 | 1.14 (0.43 − 3.02) | 0.79 | 252 | 1.15 (0.74 − 1.77) | 0.54 |
|  | | **HER2 negative** | 130 | 0.64 (0.27 − 1.55) | 0.32 | 150 | 0.77 (0.32 − 1.82) | 0.54 | 39 | 0.98 (0.36 − 2.64) | 0.97 | 800 | 0.81 (0.63 − 1.06) | 0.13 |
| **Intrinsic subtype** | | **basal** | 241 | 0.58 (0.35 − 0.96) | 0.032 | 232 | 0.58 (0.34 − 0.97) | 0.034 | 64 | 0.93 (0.52 − 1.67) | 0.81 | 618 | 0.78 (0.6 − 1) | 0.048 |
|  | | **luminal A** | 611 | 0.92 (0.65 − 1.31) | 0.64 | 965 | 0.92 (0.69 − 1.23) | 0.58 | 179 | 1.3 (0.88 − 1.92) | 0.19 | 1933 | 0.74 (0.63 − 0.88) | 0.00064 |
|  | | **luminal B** | 433 | 0.55 (0.38 − 0.81) | 0.002 | 430 | 0.68 (0.48 − 0.97) | 0.031 | 134 | 1.02 (0.67 − 1.57) | 0.92 | 1149 | 0.76 (0.63 − 0.92) | 0.0046 |
|  | | **HER2+** | 117 | 1.23 (0.64 − 2.35) | 0.54 | 119 | 1.72 (0.91 − 3.27) | 0.093 | 37 | 2.14 (0.99 − 4.62) | 0.048 | 251 | 0.81 (0.55 − 1.18) | 0.27 |
| **Lymph node status** | | **Lymph node positive** | 313 | 0.9 (0.61 − 1.33) | 0.59 | 382 | 1.14 (0.77 − 1.68) | 0.51 | 128 | 1.62 (1.04 − 2.55) | 0.033 | 1133 | 0.97 (0.8 − 1.19) | 0.79 |
|  | | **Lymph node negative** | 594 | 0.63 (0.43 − 0.92) | 0.017 | 988 | 0.85 (0.65 − 1.12) | 0.25 | 165 | 0.83 (0.54 − 1.27) | 0.39 | 2020 | 0.89 (0.76 − 1.06) | 0.19 |
| **Grade** | | **1** | 161 | 1.25 (0.5 − 3.12) | 0.63 | 188 | 1.04 (0.46 − 2.36) | 0.93 | 34 | 0.88 (0.33 − 2.36) | 0.8 | 345 | 0.91 (0.54 − 1.53) | 0.72 |
|  | | **2** | 387 | 0.71 (0.46 − 1.09) | 0.12 | 546 | 0.98 (0.7 − 1.39) | 0.93 | 128 | 0.94 (0.58 − 1.52) | 0.79 | 901 | 0.97 (0.76 − 1.24) | 0.82 |
|  | | **3** | 503 | 0.73 (0.52 − 1.01) | 0.057 | 458 | 1 (0.7 − 1.41) | 0.98 | 165 | 1.09 (0.74 − 1.6) | 0.66 | 903 | 1 (0.8 − 1.24) | 0.97 |
| **TP53 status** | | **mutated** | 111 | 1.03 (0.47 − 2.24) | 0.94 | 83 | 0.73 (0.29 − 1.82) | 0.5 | 34 | 1.11 (0.46 − 2.65) | 0.82 | 188 | 0.79 (0.49 − 1.27) | 0.33 |
|  | | **wild type** | 187 | 0.65 (0.34 − 1.25) | 0.2 | 109 | 0.65 (0.3 − 1.42) | 0.28 | 62 | 1 (0.5 − 1.99) | 1 | 273 | 0.77 (0.5 − 1.17) | 0.22 |
| **Pietenpol subtype** | | **basal-like 1** | 58 | 0.59 (0.19 − 1.81) | 0.35 | 65 | 0.82 (0.32 − 2.14) | 0.69 | 17 | - | | 171 | 0.68 (0.42 − 1.1) | 0.11 |
|  | | **basal-like 2** | 38 | 2.2 (0.56 − 8.58) | 0.25 | 39 | 1.61 (0.58 − 4.45) | 0.36 | 17 | - | | 76 | 0.62 (0.3 − 1.26) | 0.18 |
|  | | **immunomodulatory** | 100 | 0.56 (0.22 − 1.43) | 0.22 | 96 | 0.88 (0.35 − 2.19) | 0.78 | 17 | - | | 203 | 0.66 (0.37 − 1.2) | 0.17 |
|  | | **mesenchymal** | 73 | 0.59 (0.26 − 1.31) | 0.19 | 65 | 0.89 (0.37 − 2.14) | 0.79 | 24 | 1.18 (0.48 − 2.87) | 0.72 | 177 | 0.91 (0.59 − 1.39) | 0.65 |
|  | | **mesenchymal stem like** | 19 | - | | 17 | - | | 17 | - | | 63 | 1.48 (0.67 − 3.26) | 0.33 |
|  | | **luminal androgen receptor** | 83 | 1.01 (0.51 − 2) | 0.97 | 82 | 1.18 (0.56 − 2.51) | 0.67 | 32 | 0.77 (0.33 − 1.79) | 0.54 | 203 | 0.76 (0.51 − 1.15) | 0.19 |
| **Treatment** | | **systemically untreated patients included** | 382 | 0.7 (0.45 − 1.11) | 0.13 | 543 | 0.88 (0.63 − 1.23) | 0.46 | 137 | 0.89 (0.56 − 1.42) | 0.63 | 1010 | 0.87 (0.7 − 1.08) | 0.2 |
|  | | **systemically untreated patients excluded** | 473 | 0.74 (0.51 − 1.07) | 0.11 | 862 | 0.95 (0.71 − 1.26) | 0.7 | 117 | 1.04 (0.65 − 1.66) | 0.87 | 1881 | 0.68 (0.59 − 0.8) | 1.7e−06 |
|  | | **patients with following systemic treatment （endocrine therapy:include）** | 215 | 0.67 (0.39 − 1.15) | 0.14 | 645 | 0.88 (0.63 − 1.24) | 0.47 | 57 | 1.15 (0.58 − 2.28) | 0.69 | 1064 | 1.03 (0.81 − 1.32) | 0.79 |
|  | | **patients with following systemic treatment （endocrine therapy:exclude）** | 631 | 0.69 (0.49 − 0.97) | 0.033 | 762 | 0.94 (0.71 − 1.24) | 0.65 | 197 | 0.93 (0.64 − 1.35) | 0.69 | 1616 | 0.96 (0.81 − 1.14) | 0.63 |
|  | | **patients with following systemic treatment （tamoxifen only）** | 146 | 0.63 (0.31 − 1.27) | 0.19 | 629 | 0.87 (0.62 − 1.24) | 0.45 | 37 | 1.27 (0.52 − 3.08) | 0.59 | 809 | 1.04 (0.78 − 1.38) | 0.81 |
|  | | **patients with following systemic treatment （chemotherapy: include all）** | 300 | 0.65 (0.4 − 1.07) | 0.088 | 305 | 0.87 (0.54 − 1.4) | 0.57 | 65 | 1.13 (0.61 − 2.11) | 0.69 | 798 | 1.15 (0.88 − 1.51) | 0.3 |
|  | | **patients with following systemic treatment （chemotherapy: adjuvant only）** | 163 | 0.62 (0.34 − 1.14) | 0.12 | 197 | 1.19 (0.67 − 2.13) | 0.55 | 48 | 1.16 (0.58 − 2.32) | 0.68 | 594 | 1.38 (1.02 − 1.87) | 0.036 |
|  | | **patients with following systemic treatment （neoadjuvant only: adjuvant only）** | 156 | 1.04 (0.49 − 2.22) | 0.91 | 108 | 0.98 (0.44 − 2.17) | 0.95 | 17 | - | | 223 | 0.75 (0.43 − 1.31) | 0.31 |
|  | | **patients with following systemic treatment （chemotherapy: exclude all）** | 549 | 0.76 (0.53 − 1.08) | 0.12 | 1100 | 0.91 (0.71 − 1.17) | 0.47 | 189 | 0.89 (0.6 − 1.32) | 0.56 | 1873 | 0.95 (0.8 − 1.12) | 0.52 |

**Supplementary Table 5** The cox proportional hazard model of JAKs and six tumor-infiltrating immune cells in all BC cases.

|  | **coef** | **HR** | **95%CI_l** | **95%CI_u** | **P.value** | **sig** |
| --- | --- | --- | --- | --- | --- | --- |
| **Purity** | 0.405 | 1.499 | 0.561 | 4.006 | 0.419 |  |
| **B_cell** | -2.391 | 0.091 | 0.001 | 6.926 | 0.279 |  |
| **CD8_Tcell** | 0.285 | 1.330 | 0.084 | 21.16 | 0.840 |  |
| **CD4_Tcell** | 0.601 | 1.824 | 0.032 | 102.632 | 0.770 |  |
| **Macrophage** | 2.609 | 13.591 | 0.902 | 204.773 | 0.059 | **·** |
| **Neutrophil** | 3.063 | 21.392 | 0.098 | 4666.744 | 0.265 |  |
| **Dendritic** | -0.860 | 0.423 | 0.053 | 3.361 | 0.416 |  |
| **JAK1** | -0.162 | 0.851 | 0.613 | 1.181 | 0.334 |  |
| **JAK2** | -0.304 | 0.738 | 0.528 | 1.031 | 0.075 | **·** |
| **JAK3** | -0.002 | 0.998 | 0.683 | 1.459 | 0.993 |  |
| **TYK2** | -0.013 | 0.987 | 0.680 | 1.433 | 0.947 |  |

**Supplementary Table 6** The cox proportional hazard model of JAKs and six tumor-infiltrating immune cells in BC-Basal cases.

|  | **coef** | **HR** | **95%CI_l** | **95%CI_u** | **P.value** | **sig** |
| --- | --- | --- | --- | --- | --- | --- |
| **Purity** | 2.393 | 10.952 | 0.152 | 7.87E+02 | 0.272 |  |
| **B_cell** | 1.034 | 2.814 | 0.000 | 1.01E+05 | 0.847 |  |
| **CD8_Tcell** | -4.337 | 0.013 | 0.000 | 1.37E+01 | 0.221 |  |
| **CD4_Tcell** | 2.340 | 10.381 | 0.000 | 4.66E+05 | 0.669 |  |
| **Macrophage** | 10.564 | 38706.76 | 12.464 | 1.20E+08 | 0.010 | ***** |
| **Neutrophil** | 2.873 | 17.693 | 0.000 | 4.36E+07 | 0.702 |  |
| **Dendritic** | -0.199 | 0.819 | 0.002 | 3.93E+02 | 0.950 |  |
| **JAK1** | -0.225 | 0.798 | 0.332 | 1.92E+00 | 0.615 |  |
| **JAK2** | -0.491 | 0.612 | 0.230 | 1.63E+00 | 0.326 |  |
| **JAK3** | 0.160 | 1.174 | 0.315 | 4.38E+00 | 0.811 |  |
| **TYK2** | 0.680 | 1.973 | 0.753 | 5.17E+00 | 0.167 |  |

**Supplementary Table 7** The cox proportional hazard model of JAKs and six tumor-infiltrating immune cells in BC-Her2 cases.

|  | **coef** | **HR** | **95%CI_l** | **95%CI_u** | **P.value** | **sig** |
| --- | --- | --- | --- | --- | --- | --- |
| **Purity** | 1.996 | 7.36E+00 | 0.099 | 5.46E+02 | 0.364 |  |
| **B_cell** | -22.077 | 0.00E+00 | 0.000 | 9.20E-02 | 0.028 | ***** |
| **CD8_Tcell** | -1.140 | 3.20E-01 | 0.000 | 4.31E+06 | 0.892 |  |
| **CD4_Tcell** | 20.538 | 8.31E+08 | 0.000 | 1.50E+22 | 0.187 |  |
| **Macrophage** | -3.261 | 3.80E-02 | 0.000 | 6.53E+05 | 0.701 |  |
| **Neutrophil** | -23.805 | 0.00E+00 | 0.000 | 6.05E+04 | 0.180 |  |
| **Dendritic** | 6.143 | 4.65E+02 | 0.019 | 1.14E+07 | 0.233 |  |
| **JAK1** | -0.525 | 5.91E-01 | 0.065 | 5.34E+00 | 0.640 |  |
| **JAK2** | -0.256 | 7.74E-01 | 0.151 | 3.98E+00 | 0.759 |  |
| **JAK3** | -0.862 | 4.22E-01 | 0.050 | 3.58E+00 | 0.429 |  |
| **TYK2** | 1.213 | 3.36E+00 | 0.445 | 2.54E+01 | 0.240 |  |

**Supplementary Table 8** The cox proportional hazard model of JAKs and six tumor-infiltrating immune cells in BC-Luminal cases.

|  | **coef** | **HR** | **95%CI_l** | **95%CI_u** | **P.value** | **sig** |
| --- | --- | --- | --- | --- | --- | --- |
| **Purity** | 0.516 | 1.675 | 0.450 | 6.231 | 0.442 |  |
| **B_cell** | -0.729 | 0.482 | 0.000 | 528.131 | 0.838 |  |
| **CD8_Tcell** | 2.335 | 10.332 | 0.140 | 764.774 | 0.288 |  |
| **CD4_Tcell** | 1.603 | 4.970 | 0.005 | 4801.579 | 0.648 |  |
| **Macrophage** | 2.841 | 17.133 | 0.225 | 1307.348 | 0.199 |  |
| **Neutrophil** | 7.577 | 1952.112 | 0.213 | 17932273 | 0.104 |  |
| **Dendritic** | -3.518 | 0.030 | 0.001 | 0.878 | 0.042 | ***** |
| **JAK1** | -0.237 | 0.789 | 0.469 | 1.327 | 0.372 |  |
| **JAK2** | -0.356 | 0.700 | 0.434 | 1.130 | 0.144 |  |
| **JAK3** | 0.029 | 1.029 | 0.581 | 1.823 | 0.922 |  |
| **TYK2** | -0.015 | 0.985 | 0.572 | 1.696 | 0.956 |  |
